# Supplementary material
Source: PubMed Central journal article supplement (PMC3294762)
Supplement: supp_194.5.1145_SupplementalMaterialsCombined.pdf [file supp_194.5.1145_SupplementalMaterialsCombined.pdf]

**NAD<sup>+</sup>/NADH binding domain**

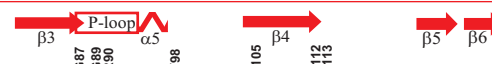

Secondary structure and residues numbers corresponds to the *Thermus aquaticus* Rex protein (PDB: 3IKT)

| Phylum                 | Accession | Protein Name                                                                                                     | Residues                                                                                                         |
|------------------------|-----------|------------------------------------------------------------------------------------------------------------------|------------------------------------------------------------------------------------------------------------------|
| Deinococcus/Thermus    | 3IKT      | Taq 4998                                                                                                         | NRKGLGICVGRIGLSALADYVPGF-GESE- <b>FELR</b> GFVDPDE- <b>KVGR</b> PVR-GGVIEHVD- <b>LLP</b> QRVPRGR- <b>I</b>       |
|                        | 2DT5      | TTIC1293                                                                                                         | NRKGLGICVGRIGLSALADYVPGF-GESE- <b>FELR</b> GFVDPDE- <b>KVGR</b> PVR-GGVIEHVD- <b>LLP</b> QRVPRGR- <b>I</b>       |
|                        |           | Dgeo 0630                                                                                                        | NQTNNVVIVGMRIGLQALANYPGA-SDYQFQVGLFDVNEA-LIGTVQR-GLTVRHDV- <b>ELRAF</b> QVTR- <b>I</b>                           |
|                        |           | Deide 14030                                                                                                      | NQTNNVVIVGMRIGLQALANYPGA-SDYQFQVGLFDVNEA-LIGTVQR-GLTVRHDV- <b>ELRAF</b> QVTR- <b>I</b>                           |
|                        |           | DR0939                                                                                                           | DQTNNVVIVGMRIGLQALANYPGA-SDYQFQVGLFDVNEA-LIGTVQR-GLTVRHDV- <b>ELRAF</b> QVTR- <b>I</b>                           |
|                        |           | CTC02428                                                                                                         | TKEVRCIIILGGNIGQALANYNPK-EKLGFLRLAIFDINPK-LVGLKTR-DIEIKRID- <b>TLED</b> YLKRN- <b>V</b>                          |
|                        |           | CKL 0453                                                                                                         | TKVVRVILIGAGNIGQALANYNPK-EKLGFLRLAIFDINPK-LVGLKTR-DIEIKRID- <b>TLED</b> YLKRN- <b>V</b>                          |
|                        |           | CB03306                                                                                                          | NNEPNTIILIGAGNIGQALANYNPK-EKLGFLRLAIFDINPK-LVGLKTR-DIEIKRID- <b>TLED</b> YLKRN- <b>V</b>                         |
|                        |           | GAZ2713                                                                                                          | TKMNTIILIGAGNIGQALANYNPK-EKLGFLRLAIFDINPK-LVGLKTR-DIEIKRID- <b>TLED</b> YLKRN- <b>V</b>                          |
|                        |           | NT01CX 0475                                                                                                      | DENNNTIILIGAGNIGQALANYNPK-EKLGFLRLAIFDINPK-LVGLKTR-DIEIKRID- <b>TLED</b> YLKRN- <b>V</b>                         |
| Clostridiaceae         |           | Cbei 0320                                                                                                        | DRGEAALVAGNIGQAVSYRSE-ENLEFKITAFIDANPK-LIGMKTR-DVEIMDD- <b>EMES</b> VLSEHK- <b>I</b>                             |
|                        |           | CBY 3040                                                                                                         | DRGKAALVAGNIGQAVSYRSE-ENLEFKITAFIDANPK-LIGMKTR-DVEIMDD- <b>EMK</b> ILENEK- <b>I</b>                              |
|                        |           | CPF 2586                                                                                                         | TRDYNVILIGAGNIGQALANYNPK-NRLEFKLIGLFDANPK-MFGIKTR-DVEIQDVE- <b>KLKD</b> FKVKNY- <b>I</b>                         |
|                        |           | Clos 2464                                                                                                        | DKTVKLILIGAGNIGQALANYNPK-ERSGFELIALFDINPK-LGLKTR-DIEFRDID- <b>ELRQ</b> FINENY- <b>I</b>                          |
|                        |           | CD0171                                                                                                           | DRPNVAVLIGAGNIGQALANYNPK-RKAGFELKALFDANPK-MIGLKTR-EFEVLDS- <b>TLED</b> FKNNK- <b>I</b>                           |
|                        |           | CLOHR 00042                                                                                                      | DRPNVAVLIGAGNIGQALANYNPK-RKAGFELKALFDANPK-MIGLKTR-EFEVLDS- <b>TLED</b> FKNNK- <b>I</b>                           |
|                        |           | CLOBAR 00711                                                                                                     | DRPNVAVLIGAGNIGQALANYNPK-RKAGFELKALFDANPK-MIGLKTR-EFEVLDS- <b>TLED</b> FKNNK- <b>I</b>                           |
|                        |           | CLOEX 01590                                                                                                      | DVNHMIIILIGAGNIGQALANYNPK-ERSGFVLRKIGFDVNR-LEGVTR- <b>GIE</b> TRMD- <b>ELSD</b> FKNNK- <b>I</b>                  |
|                        |           | CLOSC 00613                                                                                                      | EEDHNTIILIGAGNIGQALANYNPK-EKRGFLKIGFDVNR-LEGVTR- <b>GIE</b> TRMD- <b>GLKT</b> FKNNK- <b>V</b>                    |
|                        |           | Cphy 0901                                                                                                        | DKKNNVILIGAGNIGQALANYNPK-ERSGFVLRKIGFDVNR-LEGVTR- <b>GIE</b> TRMD- <b>ELRQ</b> FINENY- <b>I</b>                  |
| Thermoanaerobacterales |           | CLOBL 04148                                                                                                      | DRQENVTIILIGAGNIGQALANYNPK-ERSGFVLRKIGFDVNR-LGLVTR- <b>GIE</b> TRMD- <b>ELRQ</b> FINENY- <b>I</b>                |
|                        |           | CLOS21 01144                                                                                                     | DKRNDMIIIGAGNIGQALANYNPK-ERSGFVLRKIGFDVNR-LGLVTR- <b>GIE</b> TRMD- <b>ELRQ</b> FINENY- <b>I</b>                  |
|                        |           | Cce1 2882                                                                                                        | NKTFYCIILIGAGNIGQALANYNPK-IRKGFVLRKIGFDVNR-VVGGKIK-NLEVMD- <b>SLEP</b> FLNHR- <b>V</b>                           |
|                        |           | CLOLEP 02947                                                                                                     | SNRFNAILIGAGNIGQALANYNPK-ERSGFVLRKIGFDVNR-LGLVTR- <b>GIE</b> TRMD- <b>ELRQ</b> FINENY- <b>I</b>                  |
|                        |           | TTE0543                                                                                                          | DKTNNVILIGAGNIGQALANYNPK-EKSGFNLKIGFDINPK-LFGLKTR-DVEIMDD- <b>KVEE</b> FINHR- <b>I</b>                           |
|                        |           | Teth514 0496                                                                                                     | DKTNNVILIGAGNIGQALANYNPK-EKSGFNLKIGFDINPK-LFGLKTR-DVEIMDD- <b>KVEE</b> FINHR- <b>I</b>                           |
|                        |           | Csac 1220                                                                                                        | DKNFKMLIIGAGNIGQALANYNPK-YKGFVLRVGLFDVDEQ-KVGRKTR-NVKIQHD- <b>ELDK</b> FKNNK- <b>I</b>                           |
|                        |           | Arth 3297                                                                                                        | TRDKVAVLIGAGNIGQALANYNPK-ERSGFVLRVGLFDVDEQ-KVGRKTR-NVKIQHD- <b>ELDK</b> FKNNK- <b>I</b>                          |
|                        |           | AAur 3294                                                                                                        | THDKVAVLIGAGNIGQALANYNPK-ERSGFVLRVGLFDVDEQ-KVGRKTR-NVKIQHD- <b>ELDK</b> FKNNK- <b>I</b>                          |
|                        |           | Amir 6731                                                                                                        | TRKHSVAVVIGLGHGALANYNPK-ERSGFVLRVGLFDVDEQ-KVGRKTR-NVKIQHD- <b>ELDK</b> FKNNK- <b>I</b>                           |
| Actinobacteria         |           | SACE 6947                                                                                                        | TRKHSVAVVIGLGHGALANYNPK-ERSGFVLRVGLFDVDEQ-KVGRKTR-NVKIQHD- <b>ELDK</b> FKNNK- <b>I</b>                           |
|                        |           | Svi 02840                                                                                                        | TRKHSVAVVIGLGHGALANYNPK-ERSGFVLRVGLFDVDEQ-KVGRKTR-NVKIQHD- <b>ELDK</b> FKNNK- <b>I</b>                           |
|                        |           | Franceal 612                                                                                                     | TRKHSVAVVIGLGHGALANYNPK-ERSGFVLRVGLFDVDEQ-KVGRKTR-NVKIQHD- <b>ELDK</b> FKNNK- <b>I</b>                           |
|                        |           | Francecl3 0484                                                                                                   | TRKHSVAVVIGLGHGALANYNPK-ERSGFVLRVGLFDVDEQ-KVGRKTR-NVKIQHD- <b>ELDK</b> FKNNK- <b>I</b>                           |
|                        |           | SCO3320                                                                                                          | TQDPVVVIVGIGLGAALANYNPK-ASRGRFVAALIDADPA-MAGKPA- <b>GIV</b> QHD- <b>ELKI</b> IQD- <b>V</b>                       |
|                        |           | SAV 4738                                                                                                         | TQDPVVVIVGIGLGAALANYNPK-ASRGRFVAALIDADPA-MAGKPA- <b>GIV</b> QHD- <b>ELKI</b> IQD- <b>V</b>                       |
|                        |           | SGR 4154                                                                                                         | TQDPVVVIVGIGLGAALANYNPK-ASRGRFVAALIDADPA-MAGKPA- <b>GIV</b> QHD- <b>ELKI</b> IQD- <b>V</b>                       |
|                        |           | Noca 0493                                                                                                        | TQDPVVVIVGIGLGAALANYNPK-ASRGRFVAALIDADPA-MAGKPA- <b>GIV</b> QHD- <b>ELKI</b> IQD- <b>V</b>                       |
|                        |           | Acel 0239                                                                                                        | TQDPVVVIVGIGLGAALANYNPK-ASRGRFVAALIDADPA-MAGKPA- <b>GIV</b> QHD- <b>ELKI</b> IQD- <b>V</b>                       |
|                        |           | JNB 09294                                                                                                        | TQDPVVVIVGIGLGAALANYNPK-ASRGRFVAALIDADPA-MAGKPA- <b>GIV</b> QHD- <b>ELKI</b> IQD- <b>V</b>                       |
| Desulfobrivionales     |           | Namu 0919                                                                                                        | HRHRVALVGLGNLQALGAGYSGF-AGRFVLSALFDVDEQ-RVGRV- <b>GRV</b> TRHD- <b>SAG</b> CVRA- <b>R</b>                        |
|                        |           | RHA1 z02054                                                                                                      | DRGHKVVVIGVGNLQALGAGYSGF-AGRFVLSALFDVDEQ-RVGRV- <b>GRV</b> TRHD- <b>SAG</b> CVRA- <b>R</b>                       |
|                        |           | ROP 17260                                                                                                        | DRGHKVVVIGVGNLQALGAGYSGF-AGRFVLSALFDVDEQ-RVGRV- <b>GRV</b> TRHD- <b>SAG</b> CVRA- <b>R</b>                       |
|                        |           | REK 16400                                                                                                        | DRGHKVVVIGVGNLQALGAGYSGF-AGRFVLSALFDVDEQ-RVGRV- <b>GRV</b> TRHD- <b>SAG</b> CVRA- <b>R</b>                       |
|                        |           | nfa 710                                                                                                          | SDGRGFTVIGVGNLQALGAGYSGF-AGRFVLSALFDVDEQ-RVGRV- <b>GRV</b> TRHD- <b>SAG</b> CVRA- <b>R</b>                       |
|                        |           | DWPF 1390                                                                                                        | NRENRVIVGIGLGRALLNPK-ELRQFINENY- <b>ELDK</b> FKNNK- <b>I</b>                                                     |
|                        |           | DVU0916                                                                                                          | NRENRVIVGIGLGRALLNPK-ELRQFINENY- <b>ELDK</b> FKNNK- <b>I</b>                                                     |
|                        |           | Dde 2702                                                                                                         | DREKNTVILIGAGNIGQALANYNPK-ERSGFVLRKIGFDVNR-LGLVTR- <b>GIE</b> TRMD- <b>ELRQ</b> FINENY- <b>I</b>                 |
|                        |           | Ddes 2257                                                                                                        | DREKNTVILIGAGNIGQALANYNPK-ERSGFVLRKIGFDVNR-LGLVTR- <b>GIE</b> TRMD- <b>ELRQ</b> FINENY- <b>I</b>                 |
|                        |           | DESPIG 02066                                                                                                     | DREKNTVILIGAGNIGQALANYNPK-ERSGFVLRKIGFDVNR-LGLVTR- <b>GIE</b> TRMD- <b>ELRQ</b> FINENY- <b>I</b>                 |
| Rex Thermotogales      |           | L11059                                                                                                           | NREKVALVGLGNLQALGAGYSGF-AGRFVLSALFDVDEQ-RVGRV- <b>GRV</b> TRHD- <b>SAG</b> CVRA- <b>R</b>                        |
|                        |           | Dret 2085                                                                                                        | DRTNNVALVGLGNLQALGAGYSGF-AGRFVLSALFDVDEQ-RVGRV- <b>GRV</b> TRHD- <b>SAG</b> CVRA- <b>R</b>                       |
|                        |           | Dbac 2793                                                                                                        | DRTNNVALVGLGNLQALGAGYSGF-AGRFVLSALFDVDEQ-RVGRV- <b>GRV</b> TRHD- <b>SAG</b> CVRA- <b>R</b>                       |
|                        |           | DMR 42180                                                                                                        | DRVVKCALVGLGNLQALGAGYSGF-AGRFVLSALFDVDEQ-RVGRV- <b>GRV</b> TRHD- <b>SAG</b> CVRA- <b>R</b>                       |
|                        |           | Desal 3723                                                                                                       | DRVVKCALVGLGNLQALGAGYSGF-AGRFVLSALFDVDEQ-RVGRV- <b>GRV</b> TRHD- <b>SAG</b> CVRA- <b>R</b>                       |
|                        |           | THA 1697                                                                                                         | NKYNNVIVGAGNIGSALADYVPGF-GESE- <b>FELR</b> GFVDPDE- <b>KVGR</b> PVR-GGVIEHVD- <b>LLP</b> QRVPRGR- <b>I</b>       |
|                        |           | Tmal 1209                                                                                                        | TQDPVVVIVGIGLGAALANYNPK-ASRGRFVAALIDADPA-MAGKPA- <b>GIV</b> QHD- <b>ELKI</b> IQD- <b>V</b>                       |
|                        |           | Fnod 0423                                                                                                        | NKEMNVVIGAGNIGSALADYVPGF-GESE- <b>FELR</b> GFVDPDE- <b>KVGR</b> PVR-GGVIEHVD- <b>LLP</b> QRVPRGR- <b>I</b>       |
|                        |           | Tlet 0332                                                                                                        | HRRNNVIVGAGNIGSALADYVPGF-GESE- <b>FELR</b> GFVDPDE- <b>KVGR</b> PVR-GGVIEHVD- <b>LLP</b> QRVPRGR- <b>I</b>       |
|                        |           | Tpet 0756                                                                                                        | KKEKLVVAGNIGRAVSYRSE-ENLEFKITAFIDANPK-LIGMKTR-DVEIMDD- <b>EMES</b> VLSEHK- <b>I</b>                              |
| Chloroflexi            |           | Tnap 0799                                                                                                        | KKEKLVVAGNIGRAVSYRSE-ENLEFKITAFIDANPK-LIGMKTR-DVEIMDD- <b>EMES</b> VLSEHK- <b>I</b>                              |
|                        |           | TRO2 0779                                                                                                        | KKEKLVVAGNIGRAVSYRSE-ENLEFKITAFIDANPK-LIGMKTR-DVEIMDD- <b>EMES</b> VLSEHK- <b>I</b>                              |
|                        |           | TM0169                                                                                                           | KKEKLVVAGNIGRAVSYRSE-ENLEFKITAFIDANPK-LIGMKTR-DVEIMDD- <b>EMES</b> VLSEHK- <b>I</b>                              |
|                        |           | CTN 0518                                                                                                         | KKEKLVVAGNIGRAVSYRSE-ENLEFKITAFIDANPK-LIGMKTR-DVEIMDD- <b>EMES</b> VLSEHK- <b>I</b>                              |
|                        |           | Kole 1558                                                                                                        | KKEKLVVAGNIGRAVSYRSE-ENLEFKITAFIDANPK-LIGMKTR-DVEIMDD- <b>EMES</b> VLSEHK- <b>I</b>                              |
|                        |           | Emob 0343                                                                                                        | ERVNVVAVLIGVGNLGRALLNPK-ELRQFINENY- <b>ELDK</b> FKNNK- <b>I</b>                                                  |
|                        |           | Cagg 0157                                                                                                        | NQHVPVIVGIGLGAALANYNPK-ASRGRFVAALIDADPA-MAGKPA- <b>GIV</b> QHD- <b>ELKI</b> IQD- <b>V</b>                        |
|                        |           | Chy400 3940                                                                                                      | HHHPVIVGIGLGAALANYNPK-ASRGRFVAALIDADPA-MAGKPA- <b>GIV</b> QHD- <b>ELKI</b> IQD- <b>V</b>                         |
|                        |           | TQDPVVVIVGIGLGAALANYNPK-ASRGRFVAALIDADPA-MAGKPA- <b>GIV</b> QHD- <b>ELKI</b> IQD- <b>V</b>                       |                                                                                                                  |
|                        |           | RoseRS 4103                                                                                                      | TREPVAVVIGLGHGALANYNPK-ASRGRFVAALIDADPA-MAGKPA- <b>GIV</b> QHD- <b>ELKI</b> IQD- <b>V</b>                        |
| Streptococcaceae       |           | Haur 4427                                                                                                        | HEVNVVIVGIGLGAALANYNPK-ASRGRFVAALIDADPA-MAGKPA- <b>GIV</b> QHD- <b>ELKI</b> IQD- <b>V</b>                        |
|                        |           | LACR 1156                                                                                                        | DOEHIALIGVGNLGRALLNPK-ELRQFINENY- <b>ELDK</b> FKNNK- <b>I</b>                                                    |
|                        |           | L71932                                                                                                           | DOEHIALIGVGNLGRALLNPK-ELRQFINENY- <b>ELDK</b> FKNNK- <b>I</b>                                                    |
|                        |           | SP 1090                                                                                                          | NSINVMVIGVGNLGRALLNPK-ELRQFINENY- <b>ELDK</b> FKNNK- <b>I</b>                                                    |
|                        |           | smi 1188                                                                                                         | NSINVMVIGVGNLGRALLNPK-ELRQFINENY- <b>ELDK</b> FKNNK- <b>I</b>                                                    |
|                        |           | SGO 1228                                                                                                         | NSINVMVIGVGNLGRALLNPK-ELRQFINENY- <b>ELDK</b> FKNNK- <b>I</b>                                                    |
|                        |           | SSA 1216                                                                                                         | NAINVMVIGVGNLGRALLNPK-ELRQFINENY- <b>ELDK</b> FKNNK- <b>I</b>                                                    |
|                        |           | SMU 1053                                                                                                         | TSTNNVIVGIGLGAALANYNPK-ASRGRFVAALIDADPA-MAGKPA- <b>GIV</b> QHD- <b>ELKI</b> IQD- <b>V</b>                        |
|                        |           | SSU05 1069                                                                                                       | TSINVMVIGVGNLGRALLNPK-ELRQFINENY- <b>ELDK</b> FKNNK- <b>I</b>                                                    |
|                        |           | st1463                                                                                                           | NATKVVIVGIGLGAALANYNPK-ASRGRFVAALIDADPA-MAGKPA- <b>GIV</b> QHD- <b>ELKI</b> IQD- <b>V</b>                        |
| Lactobacillales        |           | SP1120                                                                                                           | HSTNVVIVGIGLGAALANYNPK-ASRGRFVAALIDADPA-MAGKPA- <b>GIV</b> QHD- <b>ELKI</b> IQD- <b>V</b>                        |
|                        |           | SDEG 0880                                                                                                        | HSTNVVIVGIGLGAALANYNPK-ASRGRFVAALIDADPA-MAGKPA- <b>GIV</b> QHD- <b>ELKI</b> IQD- <b>V</b>                        |
|                        |           | Sub 1050                                                                                                         | HSTNVVIVGIGLGAALANYNPK-ASRGRFVAALIDADPA-MAGKPA- <b>GIV</b> QHD- <b>ELKI</b> IQD- <b>V</b>                        |
|                        |           | SUB0845                                                                                                          | HSTNVVIVGIGLGAALANYNPK-ASRGRFVAALIDADPA-MAGKPA- <b>GIV</b> QHD- <b>ELKI</b> IQD- <b>V</b>                        |
|                        |           | GALL0 1010                                                                                                       | HSTNVVIVGIGLGAALANYNPK-ASRGRFVAALIDADPA-MAGKPA- <b>GIV</b> QHD- <b>ELKI</b> IQD- <b>V</b>                        |
|                        |           | SAG1100                                                                                                          | HSTNVVIVGIGLGAALANYNPK-ASRGRFVAALIDADPA-MAGKPA- <b>GIV</b> QHD- <b>ELKI</b> IQD- <b>V</b>                        |
|                        |           | LGG 01260                                                                                                        | HSEQMLVIGVGNLGRALLNPK-ELRQFINENY- <b>ELDK</b> FKNNK- <b>I</b>                                                    |
|                        |           | LAF 0324                                                                                                         | DKLSVALVGVGLSALLNPK-FHQSTNLRISAADFVDEQ-LANTVKSQVIVYVSE- <b>DMKQ</b> LKQ- <b>Q</b>                                |
|                        |           | LAR 0341                                                                                                         | DSLVSVALVGVGLSALLNPK-FHQSTNLRISAADFVDEQ-LANTVKSQVIVYVSE- <b>DMKQ</b> LKQ- <b>Q</b>                               |
|                        |           | LVI5 0616                                                                                                        | DRLNVALVGVGNLGRALLNPK-FHQSNVIRISAADFVDEQ-LANTVKSQVIVYVSE- <b>DMKQ</b> LKQ- <b>Q</b>                              |
| Staphylococcaceae      |           | lp 0725                                                                                                          | DTLNVALVGVGNLGRALLNPK-FHQSNVIRISAADFVDEQ-LANTVKSQVIVYVSE- <b>DMKQ</b> LKQ- <b>Q</b>                              |
|                        |           | LSL 1214                                                                                                         | DTLNVALVGVGNLGRALLNPK-FHQSNVIRISAADFVDEQ-LANTVKSQVIVYVSE- <b>DMKQ</b> LKQ- <b>Q</b>                              |
|                        |           | LQ455                                                                                                            | DTLNVALVGVGNLGRALLNPK-FHQSNVIRISAADFVDEQ-LANTVKSQVIVYVSE- <b>DMKQ</b> LKQ- <b>Q</b>                              |
|                        |           | LBUL 1498                                                                                                        | DTLNVALVGVGNLGRALLNPK-FHQSNVIRISAADFVDEQ-LANTVKSQVIVYVSE- <b>DMKQ</b> LKQ- <b>Q</b>                              |
|                        |           | LB0398                                                                                                           | DTLNVALVGVGNLGRALLNPK-FHQSNVIRISAADFVDEQ-LANTVKSQVIVYVSE- <b>DMKQ</b> LKQ- <b>Q</b>                              |
|                        |           | lhv 0416                                                                                                         | DTLNVALVGVGNLGRALLNPK-FHQSNVIRISAADFVDEQ-LANTVKSQVIVYVSE- <b>DMKQ</b> LKQ- <b>Q</b>                              |
|                        |           | LSEI 2245                                                                                                        | DRLNVALVGVGNLGRALLNPK-FHQSNVIRISAADFVDEQ-LANTVKSQVIVYVSE- <b>DMKQ</b> LKQ- <b>Q</b>                              |
|                        |           | LS0356                                                                                                           | DRLNVALVGVGNLGRALLNPK-FHQSNVIRISAADFVDEQ-LANTVKSQVIVYVSE- <b>DMKQ</b> LKQ- <b>Q</b>                              |
|                        |           | LEUM 1774                                                                                                        | DSLINVALVGVGNLGRALLNPK-FHQSNVIRISAADFVDEQ-LANTVKSQVIVYVSE- <b>DMKQ</b> LKQ- <b>Q</b>                             |
|                        |           | OEOE 1398                                                                                                        | DKLNVALVGVGNLGRALLNPK-FHQSNVIRISAADFVDEQ-LANTVKSQVIVYVSE- <b>DMKQ</b> LKQ- <b>Q</b>                              |
| Bacillales             |           | PEPE 1470                                                                                                        | DTANVALVGVGNLGRALLNPK-FHQSNVIRISAADFVDEQ-LANTVKSQVIVYVSE- <b>DMKQ</b> LKQ- <b>Q</b>                              |
|                        |           | SE1647                                                                                                           | SDQIKIIVGIGLGAALANYNPK-ASRGRFVAALIDADPA-MAGKPA- <b>GIV</b> QHD- <b>ELKI</b> IQD- <b>V</b>                        |
|                        |           | STACA0001 0533                                                                                                   | SDEIKIIVGIGLGAALANYNPK-ASRGRFVAALIDADPA-MAGKPA- <b>GIV</b> QHD- <b>ELKI</b> IQD- <b>V</b>                        |
|                        |           | SA1851                                                                                                           | SDQIKIIVGIGLGAALANYNPK-ASRGRFVAALIDADPA-MAGKPA- <b>GIV</b> QHD- <b>ELKI</b> IQD- <b>V</b>                        |
|                        |           | SA0933                                                                                                           | SDQIKIIVGIGLGAALANYNPK-ASRGRFVAALIDADPA-MAGKPA- <b>GIV</b> QHD- <b>ELKI</b> IQD- <b>V</b>                        |
|                        |           | SH0886                                                                                                           | SDQIKIIVGIGLGAALANYNPK-ASRGRFVAALIDADPA-MAGKPA- <b>GIV</b> QHD- <b>ELKI</b> IQD- <b>V</b>                        |
|                        |           | Sca 1553                                                                                                         | SDQIKIIVGIGLGAALANYNPK-ASRGRFVAALIDADPA-MAGKPA- <b>GIV</b> QHD- <b>ELKI</b> IQD- <b>V</b>                        |
|                        |           | MCCL 1721                                                                                                        | DMIKVAVLIGVGNLGRALLNPK-ELRQFINENY- <b>ELDK</b> FKNNK- <b>I</b>                                                   |
|                        |           | RBAM 06420                                                                                                       | DETNVIVGIGLGAALANYNPK-ASRGRFVAALIDADPA-MAGKPA- <b>GIV</b> QHD- <b>ELKI</b> IQD- <b>V</b>                         |
|                        |           | B5U05970                                                                                                         | DETNVIVGIGLGAALANYNPK-ASRGRFVAALIDADPA-MAGKPA- <b>GIV</b> QHD- <b>ELKI</b> IQD- <b>V</b>                         |
| Rex1 Thermotogales     |           | BLi00618                                                                                                         | DETNVIVGIGLGAALANYNPK-ASRGRFVAALIDADPA-MAGKPA- <b>GIV</b> QHD- <b>ELKI</b> IQD- <b>V</b>                         |
|                        |           | BPUM 0528                                                                                                        | DETNVIVGIGLGAALANYNPK-ASRGRFVAALIDADPA-MAGKPA- <b>GIV</b> QHD- <b>ELKI</b> IQD- <b>V</b>                         |
|                        |           | GK0242                                                                                                           | DEVVALVGVGNLGRALLNPK-ELRQFINENY- <b>ELDK</b> FKNNK- <b>I</b>                                                     |
|                        |           | Aflv 0208                                                                                                        | DETVALVGVGNLGRALLNPK-ELRQFINENY- <b>ELDK</b> FKNNK- <b>I</b>                                                     |
|                        |           | BC0291                                                                                                           | DDIIVGIGLGAALANYNPK-ASRGRFVAALIDADPA-MAGKPA- <b>GIV</b> QHD- <b>ELKI</b> IQD- <b>V</b>                           |
|                        |           | CB0652                                                                                                           | HEIIVGIGLGAALANYNPK-ASRGRFVAALIDADPA-MAGKPA- <b>GIV</b> QHD- <b>ELKI</b> IQD- <b>V</b>                           |
|                        |           | AB0487                                                                                                           | DERNVIVGIGLGAALANYNPK-ASRGRFVAALIDADPA-MAGKPA- <b>GIV</b> QHD- <b>ELKI</b> IQD- <b>V</b>                         |
|                        |           | BH0551                                                                                                           | DELKVMVIGVGNLGRALLNPK-ELRQFINENY- <b>ELDK</b> FKNNK- <b>I</b>                                                    |
|                        |           | Pjdr2 2450                                                                                                       | DQRNVALVGVGNLGRALLNPK-FHQSNVIRISAADFVDEQ-LANTVKSQVIVYVSE- <b>DMKQ</b> LKQ- <b>Q</b>                              |
|                        |           | Tpet 1366                                                                                                        | NNTNMIIVGANDLARALLSLD- <b>ESKAG</b> - <b>VKV</b> VAVFDEKE- <b>NVGK</b> FTG-EFAVRELD- <b>VLER</b> VRFRD- <b>A</b> |
|                        | Tnap 1384 | NNTNMIIVGANDLARALLSLD- <b>ESKAG</b> - <b>VKV</b> VAVFDEKE- <b>NVGK</b> FTG-EFAVRELD- <b>VLER</b> VRFRD- <b>A</b> |                                                                                                                  |
|                        | TRO2 1320 | NNTNMIIVGANDLARALLSLD- <b>ESKAG</b> - <b>VKV</b> VAVFDEKE- <b>NVGK</b> FTG-EFAVRELD- <b>VLER</b> VRFRD- <b>A</b> |                                                                                                                  |
|                        | TM1427    | NNTNMIIVGANDLARALLSLD- <b>ESKAG</b> - <b>VKV</b> VAVFDEKE- <b>NVGK</b> FTG-EFAVRELD- <b>VLER</b> VRFRD- <b>A</b> |                                                                                                                  |
|                        | CTN 1066  | NSTNMIIVGANDLARALLSLD- <b>ESKAG</b> - <b>VKV</b> VAVFDEKE- <b>NVGK</b> FTG-EFAVRELD- <b>VLER</b> VRFRD- <b>A</b> |                                                                                                                  |
|                        | THA 788   | GVMNIIIVGAGNIGSALADYVPGF-GESE- <b>FELR</b> GFVDPDE- <b>KVGR</b> PVR-GGVIEHVD- <b>LLP</b> QRVPRGR- <b>I</b>       |                                                                                                                  |
|                        | Tml 0489  | GVMNIIIVGAGNIGSALADYVPGF-GESE- <b>FELR</b> GFVDPDE- <b>KVGR</b> PVR-GGVIEHVD- <b>LLP</b> QRVPRGR- <b>I</b>       |                                                                                                                  |
|                        | Fnod 0224 | KDRDSIIIVGAGNIGSALADYVPGF-GESE- <b>FELR</b> GFVDPDE- <b>KVGR</b> PVR-GGVIEHVD- <b>LLP</b> QRVPRGR- <b>I</b>      |                                                                                                                  |
|                        | Tlet 0951 | RKTQVILVIGAGNIGSALADYVPGF-GESE- <b>FELR</b> GFVDPDE- <b>KVGR</b> PVR-GGVIEHVD- <b>LLP</b> QRVPRGR- <b>I</b>      |                                                                                                                  |
|                        | ruler     | 140.....150.....160.....170.....180.....190.....200.....210.....                                                 |                                                                                                                  |

Secondary structure and residues numbers corresponds to the *Thermus aquaticus* Rex protein (PDB: 3IKT)

Residues that are essential for NADH-binding and dimer formation are shown by red and gray asterisks, respectively.

**NAD<sup>+</sup>/NADH binding domain**

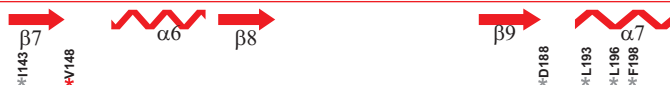

Secondary structure and residues numbers corresponds to the *Thermus aquaticus* Rex protein (PDB: 3IKT)

| Phylum                 | Accession      | Protein Name                                                                                                                                                         | Sequence                                                                                                                                                                          | Residue                                                                                                                                              |
|------------------------|----------------|----------------------------------------------------------------------------------------------------------------------------------------------------------------------|-----------------------------------------------------------------------------------------------------------------------------------------------------------------------------------|------------------------------------------------------------------------------------------------------------------------------------------------------|
| Deinococcus/Thermus    | 3IKT           | Taq 4998                                                                                                                                                             | E <sup>*</sup> IALLV <sup>*</sup> PREAAK <sup>*</sup> AADLLV <sup>*</sup> AAIGIK <sup>*</sup> GLNFAPV <sup>*</sup> LVLE <sup>*</sup> V                                            | 1143                                                                                                                                                 |
|                        | 2DT5           | TTG1293                                                                                                                                                              | E <sup>*</sup> IALLV <sup>*</sup> PREAAK <sup>*</sup> AADLLV <sup>*</sup> AAIGIK <sup>*</sup> GLNFAPV <sup>*</sup> LVLE <sup>*</sup> V                                            | 1148                                                                                                                                                 |
|                        | Dgeo           | 0630                                                                                                                                                                 | DMGLAV <sup>*</sup> PREAQA <sup>*</sup> AAQALADAGV <sup>*</sup> RGILNFAPV <sup>*</sup> IQPS                                                                                       |                                                                                                                                                      |
|                        | Deide          | 14030                                                                                                                                                                | DMGLAV <sup>*</sup> PREAQA <sup>*</sup> AAQALADAGV <sup>*</sup> RGILNFAPV <sup>*</sup> IQPS                                                                                       |                                                                                                                                                      |
| Clostridiaceae         | DRO939         | DMGLLV <sup>*</sup> PAEHAQA <sup>*</sup> AAQALV <sup>*</sup> AAVGGILNFAPV <sup>*</sup> LVLE <sup>*</sup> V                                                           |                                                                                                                                                                                   |                                                                                                                                                      |
|                        | CTC02428       | DVGLI <sup>*</sup> CVPS <sup>*</sup> SAQK <sup>*</sup> VC <sup>*</sup> ILIR <sup>*</sup> NNV <sup>*</sup> KGIW <sup>*</sup> NFAPV <sup>*</sup> DLK <sup>*</sup> VE   |                                                                                                                                                                                   |                                                                                                                                                      |
|                        | CKL            | 0453                                                                                                                                                                 | DIGIIC <sup>*</sup> VPSS <sup>*</sup> NNGK <sup>*</sup> VC <sup>*</sup> INIL <sup>*</sup> VKNV <sup>*</sup> KGIW <sup>*</sup> NFAPV <sup>*</sup> DLV <sup>*</sup> PE              |                                                                                                                                                      |
|                        | CB03306        | DIGIIC <sup>*</sup> VPSS <sup>*</sup> NNGK <sup>*</sup> VC <sup>*</sup> INIL <sup>*</sup> VKNV <sup>*</sup> KGIW <sup>*</sup> NFAPV <sup>*</sup> DLV <sup>*</sup> PE |                                                                                                                                                                                   |                                                                                                                                                      |
|                        | CAC2713        | DIGIIC <sup>*</sup> VPSS <sup>*</sup> NNGK <sup>*</sup> VC <sup>*</sup> INIL <sup>*</sup> VKNV <sup>*</sup> KGIW <sup>*</sup> NFAPV <sup>*</sup> DLV <sup>*</sup> PE |                                                                                                                                                                                   |                                                                                                                                                      |
|                        | NT01CX         | 0475                                                                                                                                                                 | HGVIC <sup>*</sup> VPSS <sup>*</sup> NNGK <sup>*</sup> VC <sup>*</sup> INIL <sup>*</sup> VKNV <sup>*</sup> KGIW <sup>*</sup> NFAPV <sup>*</sup> DLV <sup>*</sup> PE               |                                                                                                                                                      |
|                        | CGIC           | 0320                                                                                                                                                                 | CGICLV <sup>*</sup> CPKKA <sup>*</sup> NA <sup>*</sup> YV <sup>*</sup> ADRL <sup>*</sup> VAGC <sup>*</sup> IGLNFAPV <sup>*</sup> LVLE <sup>*</sup> V                              |                                                                                                                                                      |
|                        | CBY            | 3040                                                                                                                                                                 | CGICLV <sup>*</sup> CPKKA <sup>*</sup> NA <sup>*</sup> YV <sup>*</sup> ADRL <sup>*</sup> VAGC <sup>*</sup> IGLNFAPV <sup>*</sup> LVLE <sup>*</sup> V                              |                                                                                                                                                      |
|                        | CPF            | 2586                                                                                                                                                                 | HGVIC <sup>*</sup> VPSS <sup>*</sup> NNGK <sup>*</sup> VC <sup>*</sup> INIL <sup>*</sup> VKNV <sup>*</sup> KGIW <sup>*</sup> NFAPV <sup>*</sup> DLV <sup>*</sup> PE               |                                                                                                                                                      |
|                        | Clos           | 2464                                                                                                                                                                 | DIVVLS <sup>*</sup> PEKVA <sup>*</sup> SVV <sup>*</sup> IK <sup>*</sup> LNK <sup>*</sup> IN <sup>*</sup> VGGI <sup>*</sup> WNFAPV <sup>*</sup> DLK <sup>*</sup> VSD               |                                                                                                                                                      |
|                        | CD0171         | DIAVLC <sup>*</sup> IPKNGA <sup>*</sup> QELN <sup>*</sup> RVKAG <sup>*</sup> IGVW <sup>*</sup> NFAPV <sup>*</sup> DLV <sup>*</sup> PE                                |                                                                                                                                                                                   |                                                                                                                                                      |
|                        | CLOHIR         | 00042                                                                                                                                                                | DIAVLC <sup>*</sup> IPKNGA <sup>*</sup> QELN <sup>*</sup> RVKAG <sup>*</sup> IGVW <sup>*</sup> NFAPV <sup>*</sup> DLV <sup>*</sup> PE                                             |                                                                                                                                                      |
|                        | CLOBAR         | 00711                                                                                                                                                                | DIGIIC <sup>*</sup> VPSS <sup>*</sup> NNGK <sup>*</sup> VC <sup>*</sup> INIL <sup>*</sup> VKNV <sup>*</sup> KGIW <sup>*</sup> NFAPV <sup>*</sup> DLV <sup>*</sup> PE              |                                                                                                                                                      |
|                        | CLONEX         | 01590                                                                                                                                                                | E <sup>*</sup> IAVL <sup>*</sup> ITPK <sup>*</sup> KA <sup>*</sup> TE <sup>*</sup> VADML <sup>*</sup> VESG <sup>*</sup> IKAI <sup>*</sup> WNFAPV <sup>*</sup> DLV <sup>*</sup> PE |                                                                                                                                                      |
|                        | CLOSCI         | 00613                                                                                                                                                                | E <sup>*</sup> IAVL <sup>*</sup> ITPK <sup>*</sup> KA <sup>*</sup> TE <sup>*</sup> VADML <sup>*</sup> VESG <sup>*</sup> IKAI <sup>*</sup> WNFAPV <sup>*</sup> DLV <sup>*</sup> PE |                                                                                                                                                      |
| Thermoanaerobacterales | Cphy           | 0901                                                                                                                                                                 | N <sup>*</sup> AAAL <sup>*</sup> ITPK <sup>*</sup> KA <sup>*</sup> TE <sup>*</sup> VADML <sup>*</sup> VESG <sup>*</sup> IKAI <sup>*</sup> WNFAPV <sup>*</sup> DLV <sup>*</sup> PE |                                                                                                                                                      |
|                        | CLOBOL         | 01448                                                                                                                                                                | E <sup>*</sup> IALLV <sup>*</sup> PREAAK <sup>*</sup> AADLLV <sup>*</sup> AAIGIK <sup>*</sup> GLNFAPV <sup>*</sup> LVLE <sup>*</sup> V                                            |                                                                                                                                                      |
|                        | CLOSS21        | 01144                                                                                                                                                                | E <sup>*</sup> IALLV <sup>*</sup> PREAAK <sup>*</sup> AADLLV <sup>*</sup> AAIGIK <sup>*</sup> GLNFAPV <sup>*</sup> LVLE <sup>*</sup> V                                            |                                                                                                                                                      |
|                        | Cosl           | 2132                                                                                                                                                                 | E <sup>*</sup> IALLV <sup>*</sup> PREAAK <sup>*</sup> AADLLV <sup>*</sup> AAIGIK <sup>*</sup> GLNFAPV <sup>*</sup> LVLE <sup>*</sup> V                                            |                                                                                                                                                      |
|                        | CLOLEI         | 02947                                                                                                                                                                | D <sup>*</sup> MAIL <sup>*</sup> CPK <sup>*</sup> NDNA <sup>*</sup> YV <sup>*</sup> ADRL <sup>*</sup> VAGC <sup>*</sup> IGLNFAPV <sup>*</sup> LVLE <sup>*</sup> V                 |                                                                                                                                                      |
|                        | TT0543         | D <sup>*</sup> MAIL <sup>*</sup> CPK <sup>*</sup> NDNA <sup>*</sup> YV <sup>*</sup> ADRL <sup>*</sup> VAGC <sup>*</sup> IGLNFAPV <sup>*</sup> LVLE <sup>*</sup> V    |                                                                                                                                                                                   |                                                                                                                                                      |
|                        | Teth514        | 0496                                                                                                                                                                 | DIGIIC <sup>*</sup> VPSS <sup>*</sup> NNGK <sup>*</sup> VC <sup>*</sup> INIL <sup>*</sup> VKNV <sup>*</sup> KGIW <sup>*</sup> NFAPV <sup>*</sup> DLV <sup>*</sup> PE              |                                                                                                                                                      |
|                        | Csac           | 1220                                                                                                                                                                 | DIGIIC <sup>*</sup> VPSS <sup>*</sup> NNGK <sup>*</sup> VC <sup>*</sup> INIL <sup>*</sup> VKNV <sup>*</sup> KGIW <sup>*</sup> NFAPV <sup>*</sup> DLV <sup>*</sup> PE              |                                                                                                                                                      |
|                        | Arth           | 3297                                                                                                                                                                 | NMVVIAL <sup>*</sup> PAVA <sup>*</sup> AAQV <sup>*</sup> CV <sup>*</sup> DRV <sup>*</sup> LAAG <sup>*</sup> RSIL <sup>*</sup> SFAPV <sup>*</sup> LVLE <sup>*</sup> V              |                                                                                                                                                      |
|                        | AAur           | 3294                                                                                                                                                                 | NMVVIAL <sup>*</sup> PAVA <sup>*</sup> AAQV <sup>*</sup> CV <sup>*</sup> DRV <sup>*</sup> LAAG <sup>*</sup> RSIL <sup>*</sup> SFAPV <sup>*</sup> LVLE <sup>*</sup> V              |                                                                                                                                                      |
|                        | Amir           | 6731                                                                                                                                                                 | SIGVIA <sup>*</sup> PP <sup>*</sup> AAQA <sup>*</sup> QV <sup>*</sup> CDRL <sup>*</sup> VAGC <sup>*</sup> IGLNFAPV <sup>*</sup> LVLE <sup>*</sup> V                               |                                                                                                                                                      |
|                        | SACE           | 6947                                                                                                                                                                 | TIGVIA <sup>*</sup> PP <sup>*</sup> AAQA <sup>*</sup> QV <sup>*</sup> CDRL <sup>*</sup> VAGC <sup>*</sup> IGLNFAPV <sup>*</sup> LVLE <sup>*</sup> V                               |                                                                                                                                                      |
|                        | Svir           | 02840                                                                                                                                                                | SIGVIA <sup>*</sup> PP <sup>*</sup> AAQA <sup>*</sup> QV <sup>*</sup> CDRL <sup>*</sup> VAGC <sup>*</sup> IGLNFAPV <sup>*</sup> LVLE <sup>*</sup> V                               |                                                                                                                                                      |
|                        | FraneanI       | 6132                                                                                                                                                                 | TIGVIA <sup>*</sup> PP <sup>*</sup> AAQA <sup>*</sup> QV <sup>*</sup> CDRL <sup>*</sup> VAGC <sup>*</sup> IGLNFAPV <sup>*</sup> LVLE <sup>*</sup> V                               |                                                                                                                                                      |
|                        | Actinobacteria | Franc31                                                                                                                                                              | 0484                                                                                                                                                                              | TIGMICH <sup>*</sup> PA <sup>*</sup> AAQA <sup>*</sup> QV <sup>*</sup> CDRL <sup>*</sup> VAGC <sup>*</sup> IGLNFAPV <sup>*</sup> LVLE <sup>*</sup> V |
| SC0332                 |                | SIGVIA <sup>*</sup> PP <sup>*</sup> AAQA <sup>*</sup> QV <sup>*</sup> CDRL <sup>*</sup> VAGC <sup>*</sup> IGLNFAPV <sup>*</sup> LVLE <sup>*</sup> V                  |                                                                                                                                                                                   |                                                                                                                                                      |
| SAV                    |                | 4738                                                                                                                                                                 | SIGVIA <sup>*</sup> PP <sup>*</sup> AAQA <sup>*</sup> QV <sup>*</sup> CDRL <sup>*</sup> VAGC <sup>*</sup> IGLNFAPV <sup>*</sup> LVLE <sup>*</sup> V                               |                                                                                                                                                      |
| SGR                    |                | 4154                                                                                                                                                                 | SIGVIA <sup>*</sup> PP <sup>*</sup> AAQA <sup>*</sup> QV <sup>*</sup> CDRL <sup>*</sup> VAGC <sup>*</sup> IGLNFAPV <sup>*</sup> LVLE <sup>*</sup> V                               |                                                                                                                                                      |
| Noca                   |                | 0493                                                                                                                                                                 | AIGVIA <sup>*</sup> PP <sup>*</sup> AAQA <sup>*</sup> QV <sup>*</sup> CDRL <sup>*</sup> VAGC <sup>*</sup> IGLNFAPV <sup>*</sup> LVLE <sup>*</sup> V                               |                                                                                                                                                      |
| Acel                   |                | 0239                                                                                                                                                                 | AIGVIA <sup>*</sup> PP <sup>*</sup> AAQA <sup>*</sup> QV <sup>*</sup> CDRL <sup>*</sup> VAGC <sup>*</sup> IGLNFAPV <sup>*</sup> LVLE <sup>*</sup> V                               |                                                                                                                                                      |
| JNB                    |                | 09294                                                                                                                                                                | AIGVIA <sup>*</sup> PP <sup>*</sup> AAQA <sup>*</sup> QV <sup>*</sup> CDRL <sup>*</sup> VAGC <sup>*</sup> IGLNFAPV <sup>*</sup> LVLE <sup>*</sup> V                               |                                                                                                                                                      |
| Namu                   |                | 0919                                                                                                                                                                 | SIGVIA <sup>*</sup> PP <sup>*</sup> AAQA <sup>*</sup> QV <sup>*</sup> CDRL <sup>*</sup> VAGC <sup>*</sup> IGLNFAPV <sup>*</sup> LVLE <sup>*</sup> V                               |                                                                                                                                                      |
| RHAL                   |                | ro02054                                                                                                                                                              | TIGVIA <sup>*</sup> PP <sup>*</sup> AAQA <sup>*</sup> QV <sup>*</sup> CDRL <sup>*</sup> VAGC <sup>*</sup> IGLNFAPV <sup>*</sup> LVLE <sup>*</sup> V                               |                                                                                                                                                      |
| ROP                    |                | 17260                                                                                                                                                                | TIGVIA <sup>*</sup> PP <sup>*</sup> AAQA <sup>*</sup> QV <sup>*</sup> CDRL <sup>*</sup> VAGC <sup>*</sup> IGLNFAPV <sup>*</sup> LVLE <sup>*</sup> V                               |                                                                                                                                                      |
| RER                    |                | 16400                                                                                                                                                                | TIGVIA <sup>*</sup> PP <sup>*</sup> AAQA <sup>*</sup> QV <sup>*</sup> CDRL <sup>*</sup> VAGC <sup>*</sup> IGLNFAPV <sup>*</sup> LVLE <sup>*</sup> V                               |                                                                                                                                                      |
| nfa51710               |                | TIGVIA <sup>*</sup> PP <sup>*</sup> AAQA <sup>*</sup> QV <sup>*</sup> CDRL <sup>*</sup> VAGC <sup>*</sup> IGLNFAPV <sup>*</sup> LVLE <sup>*</sup> V                  |                                                                                                                                                                                   |                                                                                                                                                      |
| DvMF                   |                | 1390                                                                                                                                                                 | E <sup>*</sup> IALLV <sup>*</sup> PREAAK <sup>*</sup> AADLLV <sup>*</sup> AAIGIK <sup>*</sup> GLNFAPV <sup>*</sup> LVLE <sup>*</sup> V                                            |                                                                                                                                                      |
| DV0916                 |                | E <sup>*</sup> IALLV <sup>*</sup> PREAAK <sup>*</sup> AADLLV <sup>*</sup> AAIGIK <sup>*</sup> GLNFAPV <sup>*</sup> LVLE <sup>*</sup> V                               |                                                                                                                                                                                   |                                                                                                                                                      |
| Dde                    |                | 2702                                                                                                                                                                 | E <sup>*</sup> IALLV <sup>*</sup> PREAAK <sup>*</sup> AADLLV <sup>*</sup> AAIGIK <sup>*</sup> GLNFAPV <sup>*</sup> LVLE <sup>*</sup> V                                            |                                                                                                                                                      |
| Desulfovibrionales     | Ddes           | 2257                                                                                                                                                                 | E <sup>*</sup> IALLV <sup>*</sup> PREAAK <sup>*</sup> AADLLV <sup>*</sup> AAIGIK <sup>*</sup> GLNFAPV <sup>*</sup> LVLE <sup>*</sup> V                                            |                                                                                                                                                      |
|                        | DESPIG         | 02066                                                                                                                                                                | E <sup>*</sup> IALLV <sup>*</sup> PREAAK <sup>*</sup> AADLLV <sup>*</sup> AAIGIK <sup>*</sup> GLNFAPV <sup>*</sup> LVLE <sup>*</sup> V                                            |                                                                                                                                                      |
|                        | L11059         | E <sup>*</sup> IALLV <sup>*</sup> PREAAK <sup>*</sup> AADLLV <sup>*</sup> AAIGIK <sup>*</sup> GLNFAPV <sup>*</sup> LVLE <sup>*</sup> V                               |                                                                                                                                                                                   |                                                                                                                                                      |
|                        | Dret           | 2085                                                                                                                                                                 | E <sup>*</sup> IALLV <sup>*</sup> PREAAK <sup>*</sup> AADLLV <sup>*</sup> AAIGIK <sup>*</sup> GLNFAPV <sup>*</sup> LVLE <sup>*</sup> V                                            |                                                                                                                                                      |
|                        | Dbac           | 2793                                                                                                                                                                 | E <sup>*</sup> IALLV <sup>*</sup> PREAAK <sup>*</sup> AADLLV <sup>*</sup> AAIGIK <sup>*</sup> GLNFAPV <sup>*</sup> LVLE <sup>*</sup> V                                            |                                                                                                                                                      |
|                        | DMR            | 42180                                                                                                                                                                | E <sup>*</sup> IALLV <sup>*</sup> PREAAK <sup>*</sup> AADLLV <sup>*</sup> AAIGIK <sup>*</sup> GLNFAPV <sup>*</sup> LVLE <sup>*</sup> V                                            |                                                                                                                                                      |
|                        | Desal          | 3723                                                                                                                                                                 | E <sup>*</sup> IALLV <sup>*</sup> PREAAK <sup>*</sup> AADLLV <sup>*</sup> AAIGIK <sup>*</sup> GLNFAPV <sup>*</sup> LVLE <sup>*</sup> V                                            |                                                                                                                                                      |
|                        | THA            | 1697                                                                                                                                                                 | E <sup>*</sup> IALLV <sup>*</sup> PREAAK <sup>*</sup> AADLLV <sup>*</sup> AAIGIK <sup>*</sup> GLNFAPV <sup>*</sup> LVLE <sup>*</sup> V                                            |                                                                                                                                                      |
|                        | Tme1           | 1209                                                                                                                                                                 | E <sup>*</sup> IALLV <sup>*</sup> PREAAK <sup>*</sup> AADLLV <sup>*</sup> AAIGIK <sup>*</sup> GLNFAPV <sup>*</sup> LVLE <sup>*</sup> V                                            |                                                                                                                                                      |
|                        | Fnod           | 0423                                                                                                                                                                 | E <sup>*</sup> IALLV <sup>*</sup> PREAAK <sup>*</sup> AADLLV <sup>*</sup> AAIGIK <sup>*</sup> GLNFAPV <sup>*</sup> LVLE <sup>*</sup> V                                            |                                                                                                                                                      |
|                        | Tlet           | 0332                                                                                                                                                                 | E <sup>*</sup> IALLV <sup>*</sup> PREAAK <sup>*</sup> AADLLV <sup>*</sup> AAIGIK <sup>*</sup> GLNFAPV <sup>*</sup> LVLE <sup>*</sup> V                                            |                                                                                                                                                      |
|                        | Tpe            | 0756                                                                                                                                                                 | E <sup>*</sup> IALLV <sup>*</sup> PREAAK <sup>*</sup> AADLLV <sup>*</sup> AAIGIK <sup>*</sup> GLNFAPV <sup>*</sup> LVLE <sup>*</sup> V                                            |                                                                                                                                                      |
|                        | Tnap           | 0799                                                                                                                                                                 | E <sup>*</sup> IALLV <sup>*</sup> PREAAK <sup>*</sup> AADLLV <sup>*</sup> AAIGIK <sup>*</sup> GLNFAPV <sup>*</sup> LVLE <sup>*</sup> V                                            |                                                                                                                                                      |
|                        | TRQ2           | 0779                                                                                                                                                                 | E <sup>*</sup> IALLV <sup>*</sup> PREAAK <sup>*</sup> AADLLV <sup>*</sup> AAIGIK <sup>*</sup> GLNFAPV <sup>*</sup> LVLE <sup>*</sup> V                                            |                                                                                                                                                      |
|                        | TM0169         | E <sup>*</sup> IALLV <sup>*</sup> PREAAK <sup>*</sup> AADLLV <sup>*</sup> AAIGIK <sup>*</sup> GLNFAPV <sup>*</sup> LVLE <sup>*</sup> V                               |                                                                                                                                                                                   |                                                                                                                                                      |
| CTN                    | 0518           | E <sup>*</sup> IALLV <sup>*</sup> PREAAK <sup>*</sup> AADLLV <sup>*</sup> AAIGIK <sup>*</sup> GLNFAPV <sup>*</sup> LVLE <sup>*</sup> V                               |                                                                                                                                                                                   |                                                                                                                                                      |
| Chloroflexi            | Kole           | 1558                                                                                                                                                                 | E <sup>*</sup> IALLV <sup>*</sup> PREAAK <sup>*</sup> AADLLV <sup>*</sup> AAIGIK <sup>*</sup> GLNFAPV <sup>*</sup> LVLE <sup>*</sup> V                                            |                                                                                                                                                      |
|                        | Fmob           | 0343                                                                                                                                                                 | E <sup>*</sup> IALLV <sup>*</sup> PREAAK <sup>*</sup> AADLLV <sup>*</sup> AAIGIK <sup>*</sup> GLNFAPV <sup>*</sup> LVLE <sup>*</sup> V                                            |                                                                                                                                                      |
|                        | Cagg           | 0157                                                                                                                                                                 | E <sup>*</sup> IALLV <sup>*</sup> PREAAK <sup>*</sup> AADLLV <sup>*</sup> AAIGIK <sup>*</sup> GLNFAPV <sup>*</sup> LVLE <sup>*</sup> V                                            |                                                                                                                                                      |
|                        | Chy400         | 3940                                                                                                                                                                 | E <sup>*</sup> IALLV <sup>*</sup> PREAAK <sup>*</sup> AADLLV <sup>*</sup> AAIGIK <sup>*</sup> GLNFAPV <sup>*</sup> LVLE <sup>*</sup> V                                            |                                                                                                                                                      |
|                        | Rcas           | 1392                                                                                                                                                                 | E <sup>*</sup> IALLV <sup>*</sup> PREAAK <sup>*</sup> AADLLV <sup>*</sup> AAIGIK <sup>*</sup> GLNFAPV <sup>*</sup> LVLE <sup>*</sup> V                                            |                                                                                                                                                      |
|                        | RoseRS         | 4103                                                                                                                                                                 | E <sup>*</sup> IALLV <sup>*</sup> PREAAK <sup>*</sup> AADLLV <sup>*</sup> AAIGIK <sup>*</sup> GLNFAPV <sup>*</sup> LVLE <sup>*</sup> V                                            |                                                                                                                                                      |
|                        | Hau            | 4427                                                                                                                                                                 | E <sup>*</sup> IALLV <sup>*</sup> PREAAK <sup>*</sup> AADLLV <sup>*</sup> AAIGIK <sup>*</sup> GLNFAPV <sup>*</sup> LVLE <sup>*</sup> V                                            |                                                                                                                                                      |
|                        | LACK           | 1156                                                                                                                                                                 | E <sup>*</sup> IALLV <sup>*</sup> PREAAK <sup>*</sup> AADLLV <sup>*</sup> AAIGIK <sup>*</sup> GLNFAPV <sup>*</sup> LVLE <sup>*</sup> V                                            |                                                                                                                                                      |
|                        | L71932         | E <sup>*</sup> IALLV <sup>*</sup> PREAAK <sup>*</sup> AADLLV <sup>*</sup> AAIGIK <sup>*</sup> GLNFAPV <sup>*</sup> LVLE <sup>*</sup> V                               |                                                                                                                                                                                   |                                                                                                                                                      |
|                        | SP             | 1090                                                                                                                                                                 | E <sup>*</sup> IALLV <sup>*</sup> PREAAK <sup>*</sup> AADLLV <sup>*</sup> AAIGIK <sup>*</sup> GLNFAPV <sup>*</sup> LVLE <sup>*</sup> V                                            |                                                                                                                                                      |
|                        | smi            | 1188                                                                                                                                                                 | E <sup>*</sup> IALLV <sup>*</sup> PREAAK <sup>*</sup> AADLLV <sup>*</sup> AAIGIK <sup>*</sup> GLNFAPV <sup>*</sup> LVLE <sup>*</sup> V                                            |                                                                                                                                                      |
|                        | SGO            | 1228                                                                                                                                                                 | E <sup>*</sup> IALLV <sup>*</sup> PREAAK <sup>*</sup> AADLLV <sup>*</sup> AAIGIK <sup>*</sup> GLNFAPV <sup>*</sup> LVLE <sup>*</sup> V                                            |                                                                                                                                                      |
|                        | SSA            | 1216                                                                                                                                                                 | E <sup>*</sup> IALLV <sup>*</sup> PREAAK <sup>*</sup> AADLLV <sup>*</sup> AAIGIK <sup>*</sup> GLNFAPV <sup>*</sup> LVLE <sup>*</sup> V                                            |                                                                                                                                                      |
|                        | SMU            | 1053                                                                                                                                                                 | E <sup>*</sup> IALLV <sup>*</sup> PREAAK <sup>*</sup> AADLLV <sup>*</sup> AAIGIK <sup>*</sup> GLNFAPV <sup>*</sup> LVLE <sup>*</sup> V                                            |                                                                                                                                                      |
|                        | SSU05          | 1069                                                                                                                                                                 | E <sup>*</sup> IALLV <sup>*</sup> PREAAK <sup>*</sup> AADLLV <sup>*</sup> AAIGIK <sup>*</sup> GLNFAPV <sup>*</sup> LVLE <sup>*</sup> V                                            |                                                                                                                                                      |
| Streptococcaceae       | str1463        | E <sup>*</sup> IALLV <sup>*</sup> PREAAK <sup>*</sup> AADLLV <sup>*</sup> AAIGIK <sup>*</sup> GLNFAPV <sup>*</sup> LVLE <sup>*</sup> V                               |                                                                                                                                                                                   |                                                                                                                                                      |
|                        | Spy1120        | E <sup>*</sup> IALLV <sup>*</sup> PREAAK <sup>*</sup> AADLLV <sup>*</sup> AAIGIK <sup>*</sup> GLNFAPV <sup>*</sup> LVLE <sup>*</sup> V                               |                                                                                                                                                                                   |                                                                                                                                                      |
|                        | SDBG           | 0880                                                                                                                                                                 | E <sup>*</sup> IALLV <sup>*</sup> PREAAK <sup>*</sup> AADLLV <sup>*</sup> AAIGIK <sup>*</sup> GLNFAPV <sup>*</sup> LVLE <sup>*</sup> V                                            |                                                                                                                                                      |
|                        | Seq            | 1050                                                                                                                                                                 | E <sup>*</sup> IALLV <sup>*</sup> PREAAK <sup>*</sup> AADLLV <sup>*</sup> AAIGIK <sup>*</sup> GLNFAPV <sup>*</sup> LVLE <sup>*</sup> V                                            |                                                                                                                                                      |
|                        | SUB0845        | E <sup>*</sup> IALLV <sup>*</sup> PREAAK <sup>*</sup> AADLLV <sup>*</sup> AAIGIK <sup>*</sup> GLNFAPV <sup>*</sup> LVLE <sup>*</sup> V                               |                                                                                                                                                                                   |                                                                                                                                                      |
|                        | GALLO          | 1010                                                                                                                                                                 | E <sup>*</sup> IALLV <sup>*</sup> PREAAK <sup>*</sup> AADLLV <sup>*</sup> AAIGIK <sup>*</sup> GLNFAPV <sup>*</sup> LVLE <sup>*</sup> V                                            |                                                                                                                                                      |
|                        | SAG1100        | E <sup>*</sup> IALLV <sup>*</sup> PREAAK <sup>*</sup> AADLLV <sup>*</sup> AAIGIK <sup>*</sup> GLNFAPV <sup>*</sup> LVLE <sup>*</sup> V                               |                                                                                                                                                                                   |                                                                                                                                                      |
|                        | LGG            | 01260                                                                                                                                                                | E <sup>*</sup> IALLV <sup>*</sup> PREAAK <sup>*</sup> AADLLV <sup>*</sup> AAIGIK <sup>*</sup> GLNFAPV <sup>*</sup> LVLE <sup>*</sup> V                                            |                                                                                                                                                      |
|                        | LAF            | 0324                                                                                                                                                                 | E <sup>*</sup> IALLV <sup>*</sup> PREAAK <sup>*</sup> AADLLV <sup>*</sup> AAIGIK <sup>*</sup> GLNFAPV <sup>*</sup> LVLE <sup>*</sup> V                                            |                                                                                                                                                      |
|                        | LAR            | 0341                                                                                                                                                                 | E <sup>*</sup> IALLV <sup>*</sup> PREAAK <sup>*</sup> AADLLV <sup>*</sup> AAIGIK <sup>*</sup> GLNFAPV <sup>*</sup> LVLE <sup>*</sup> V                                            |                                                                                                                                                      |
|                        | LVIS           | 0616                                                                                                                                                                 | E <sup>*</sup> IALLV <sup>*</sup> PREAAK <sup>*</sup> AADLLV <sup>*</sup> AAIGIK <sup>*</sup> GLNFAPV <sup>*</sup> LVLE <sup>*</sup> V                                            |                                                                                                                                                      |
|                        | lp             | 0725                                                                                                                                                                 | E <sup>*</sup> IALLV <sup>*</sup> PREAAK <sup>*</sup> AADLLV <sup>*</sup> AAIGIK <sup>*</sup> GLNFAPV <sup>*</sup> LVLE <sup>*</sup> V                                            |                                                                                                                                                      |
|                        | LSL            | 1214                                                                                                                                                                 | E <sup>*</sup> IALLV <sup>*</sup> PREAAK <sup>*</sup> AADLLV <sup>*</sup> AAIGIK <sup>*</sup> GLNFAPV <sup>*</sup> LVLE <sup>*</sup> V                                            |                                                                                                                                                      |
|                        | LJ0455         | E <sup>*</sup> IALLV <sup>*</sup> PREAAK <sup>*</sup> AADLLV <sup>*</sup> AAIGIK <sup>*</sup> GLNFAPV <sup>*</sup> LVLE <sup>*</sup> V                               |                                                                                                                                                                                   |                                                                                                                                                      |
|                        | LBUL           | 1498                                                                                                                                                                 | E <sup>*</sup> IALLV <sup>*</sup> PREAAK <sup>*</sup> AADLLV <sup>*</sup> AAIGIK <sup>*</sup> GLNFAPV <sup>*</sup> LVLE <sup>*</sup> V                                            |                                                                                                                                                      |
| Lactobacillales        | LB0398         | E <sup>*</sup> IALLV <sup>*</sup> PREAAK <sup>*</sup> AADLLV <sup>*</sup> AAIGIK <sup>*</sup> GLNFAPV <sup>*</sup> LVLE <sup>*</sup> V                               |                                                                                                                                                                                   |                                                                                                                                                      |
|                        | lhv            | 0416                                                                                                                                                                 | E <sup>*</sup> IALLV <sup>*</sup> PREAAK <sup>*</sup> AADLLV <sup>*</sup> AAIGIK <sup>*</sup> GLNFAPV <sup>*</sup> LVLE <sup>*</sup> V                                            |                                                                                                                                                      |
|                        | LSEI           | 2245                                                                                                                                                                 | E <sup>*</sup> IALLV <sup>*</sup> PREAAK <sup>*</sup> AADLLV <sup>*</sup> AAIGIK <sup>*</sup> GLNFAPV <sup>*</sup> LVLE <sup>*</sup> V                                            |                                                                                                                                                      |
|                        | LSA0356        | E <sup>*</sup> IALLV <sup>*</sup> PREAAK <sup>*</sup> AADLLV <sup>*</sup> AAIGIK <sup>*</sup> GLNFAPV <sup>*</sup> LVLE <sup>*</sup> V                               |                                                                                                                                                                                   |                                                                                                                                                      |
|                        | LEUM           | 1774                                                                                                                                                                 | E <sup>*</sup> IALLV <sup>*</sup> PREAAK <sup>*</sup> AADLLV <sup>*</sup> AAIGIK <sup>*</sup> GLNFAPV <sup>*</sup> LVLE <sup>*</sup> V                                            |                                                                                                                                                      |
|                        | OEOE           | 1398                                                                                                                                                                 | E <sup>*</sup> IALLV <sup>*</sup> PREAAK <sup>*</sup> AADLLV <sup>*</sup> AAIGIK <sup>*</sup> GLNFAPV <sup>*</sup> LVLE <sup>*</sup> V                                            |                                                                                                                                                      |
|                        | PEPE           | 1470                                                                                                                                                                 | E <sup>*</sup> IALLV <sup>*</sup> PREAAK <sup>*</sup> AADLLV <sup>*</sup> AAIGIK <sup>*</sup> GLNFAPV <sup>*</sup> LVLE <sup>*</sup> V                                            |                                                                                                                                                      |
|                        | SE1647         | E <sup>*</sup> IALLV <sup>*</sup> PREAAK <sup>*</sup> AADLLV <sup>*</sup> AAIGIK <sup>*</sup> GLNFAPV <sup>*</sup> LVLE <sup>*</sup> V                               |                                                                                                                                                                                   |                                                                                                                                                      |
|                        | STACA0001      | 0533                                                                                                                                                                 | E <sup>*</sup> IALLV <sup>*</sup> PREAAK <sup>*</sup> AADLLV <sup>*</sup> AAIGIK <sup>*</sup> GLNFAPV <sup>*</sup> LVLE <sup>*</sup> V                                            |                                                                                                                                                      |
|                        | SA1851         | E <sup>*</sup> IALLV <sup>*</sup> PREAAK <sup>*</sup> AADLLV <sup>*</sup> AAIGIK <sup>*</sup> GLNFAPV <sup>*</sup> LVLE <sup>*</sup> V                               |                                                                                                                                                                                   |                                                                                                                                                      |
|                        | SSP0833        | E <sup>*</sup> IALLV <sup>*</sup> PREAAK <sup>*</sup> AADLLV <sup>*</sup> AAIGIK <sup>*</sup> GLNFAPV <sup>*</sup> LVLE <sup>*</sup> V                               |                                                                                                                                                                                   |                                                                                                                                                      |
|                        | SH0986         | E <sup>*</sup> IALLV <sup>*</sup> PREAAK <sup>*</sup> AADLLV <sup>*</sup> AAIGIK <sup>*</sup> GLNFAPV <sup>*</sup> LVLE <sup>*</sup> V                               |                                                                                                                                                                                   |                                                                                                                                                      |
|                        | SCIL           | 553                                                                                                                                                                  | E <sup>*</sup> IALLV <sup>*</sup> PREAAK <sup>*</sup> AADLLV <sup>*</sup> AAIGIK <sup>*</sup> GLNFAPV <sup>*</sup> LVLE <sup>*</sup> V                                            |                                                                                                                                                      |
|                        | MCC1           | 1721                                                                                                                                                                 | E <sup>*</sup> IALLV <sup>*</sup> PREAAK <sup>*</sup> AADLLV <sup>*</sup> AAIGIK <sup>*</sup> GLNFAPV <sup>*</sup> LVLE <sup>*</sup> V                                            |                                                                                                                                                      |
|                        | RBAM           | 06420                                                                                                                                                                | E <sup>*</sup> IALLV <sup>*</sup> PREAAK <sup>*</sup> AADLLV <sup>*</sup> AAIGIK <sup>*</sup> GLNFAPV <sup>*</sup> LVLE <sup>*</sup> V                                            |                                                                                                                                                      |
| Staphylococcaceae      | BSU05970       | E <sup>*</sup> IALLV <sup>*</sup> PREAAK <sup>*</sup> AADLLV <sup>*</sup> AAIGIK <sup>*</sup> GLNFAPV <sup>*</sup> LVLE <sup>*</sup> V                               |                                                                                                                                                                                   |                                                                                                                                                      |
|                        | Bli00618       | E <sup>*</sup> IALLV <sup>*</sup> PREAAK <sup>*</sup> AADLLV <sup>*</sup> AAIGIK <sup>*</sup> GLNFAPV <sup>*</sup> LVLE <sup>*</sup> V                               |                                                                                                                                                                                   |                                                                                                                                                      |
|                        | BPUM           | 0528                                                                                                                                                                 | E <sup>*</sup> IALLV <sup>*</sup> PREAAK <sup>*</sup> AADLLV <sup>*</sup> AAIGIK <sup>*</sup> GLNFAPV <sup>*</sup> LVLE <sup>*</sup> V                                            |                                                                                                                                                      |
|                        | GR0242         | E <sup>*</sup> IALLV <sup>*</sup> PREAAK <sup>*</sup> AADLLV <sup>*</sup> AAIGIK <sup>*</sup> GLNFAPV <sup>*</sup> LVLE <sup>*</sup> V                               |                                                                                                                                                                                   |                                                                                                                                                      |
|                        | Aflv           | 0208                                                                                                                                                                 | E <sup>*</sup> IALLV <sup>*</sup> PREAAK <sup>*</sup> AADLLV <sup>*</sup> AAIGIK <sup>*</sup> GLNFAPV <sup>*</sup> LVLE <sup>*</sup> V                                            |                                                                                                                                                      |
|                        | BC0291         | E <sup>*</sup> IALLV <sup>*</sup> PREAAK <sup>*</sup> AADLLV <sup>*</sup> AAIGIK <sup>*</sup> GLNFAPV <sup>*</sup> LVLE <sup>*</sup> V                               |                                                                                                                                                                                   |                                                                                                                                                      |
|                        | OB0652         | E <sup>*</sup> IALLV <sup>*</sup> PREAAK <sup>*</sup> AADLLV <sup>*</sup> AAIGIK <sup>*</sup> GLNFAPV <sup>*</sup> LVLE <sup>*</sup> V                               |                                                                                                                                                                                   |                                                                                                                                                      |
|                        | ABC0873        | E <sup>*</sup> IALLV <sup>*</sup> PREAAK <sup>*</sup> AADLLV <sup>*</sup> AAIGIK <sup>*</sup> GLNFAPV <sup>*</sup> LVLE <sup>*</sup> V                               |                                                                                                                                                                                   |                                                                                                                                                      |
|                        | BH0551         | E <sup>*</sup> IALLV <sup>*</sup> PREAAK <sup>*</sup> AADLLV <sup>*</sup> AAIGIK <sup>*</sup> GLNFAPV <sup>*</sup> LVLE <sup>*</sup> V                               |                                                                                                                                                                                   |                                                                                                                                                      |
|                        | Pjdd2          | 2450                                                                                                                                                                 | E <sup>*</sup> IALLV <sup>*</sup> PREAAK <sup>*</sup> AADLLV <sup>*</sup> AAIGIK <sup>*</sup> GLNFAPV <sup>*</sup> LVLE <sup>*</sup> V                                            |                                                                                                                                                      |
|                        | Tpet           | 1366                                                                                                                                                                 | E <sup>*</sup> IALLV <sup>*</sup> PREAAK <sup>*</sup> AADLLV <sup>*</sup> AAIGIK <sup>*</sup> GLNFAPV <sup>*</sup> LVLE <sup>*</sup> V                                            |                                                                                                                                                      |
|                        | Tnap           | 1384                                                                                                                                                                 | E <sup>*</sup> IALLV <sup>*</sup> PREAAK <sup>*</sup> AADLLV <sup>*</sup> AAIGIK <sup>*</sup> GLNFAPV <sup>*</sup> LVLE <sup>*</sup> V                                            |                                                                                                                                                      |
|                        | TRQ2           | 1320                                                                                                                                                                 | E <sup>*</sup> IALLV <sup>*</sup> PREAAK <sup>*</sup> AADLLV <sup>*</sup> AAIGIK <sup>*</sup> GLNFAPV <sup>*</sup> LVLE <sup>*</sup> V                                            |                                                                                                                                                      |
|                        | TM1427         | E <sup>*</sup> IALLV <sup>*</sup> PREAAK <sup>*</sup> AADLLV <sup>*</sup> AAIGIK <sup>*</sup> GLNFAPV <sup>*</sup> LVLE <sup>*</sup> V                               |                                                                                                                                                                                   |                                                                                                                                                      |
|                        | CTN            | 1066                                                                                                                                                                 | E <sup>*</sup> IALLV <sup>*</sup> PREAAK <sup>*</sup> AADLLV <sup>*</sup> AAIGIK <sup>*</sup> GLNFAPV <sup>*</sup> LVLE <sup>*</sup> V                                            |                                                                                                                                                      |
| THA                    | 788            | E <sup>*</sup> IALLV <sup>*</sup> PREAAK <sup>*</sup> AADLLV <sup>*</sup> AAIGIK <sup>*</sup> GLNFAPV <sup>*</sup> LVLE <sup>*</sup> V                               |                                                                                                                                                                                   |                                                                                                                                                      |
| Bacillales             | Tme1           | 0489                                                                                                                                                                 | E <sup>*</sup> IALLV <sup>*</sup> PREAAK <sup>*</sup> AADLLV <sup>*</sup> AAIGIK <sup>*</sup> GLNFAPV <sup>*</sup> LVLE <sup>*</sup> V                                            |                                                                                                                                                      |
|                        | Fnod           | 0224                                                                                                                                                                 | E <sup>*</sup> IALLV <sup>*</sup> PREAAK <sup>*</sup> AADLLV <sup>*</sup> AAIGIK <sup>*</sup> GLNFAPV <sup>*</sup> LVLE <sup>*</sup> V                                            |                                                                                                                                                      |
|                        | Tlet           | 0951                                                                                                                                                                 | E <sup>*</sup> IALLV <sup>*</sup> PREAAK <sup>*</sup> AADLLV <sup>*</sup> AAIGIK <sup>*</sup> GLNFAPV <sup>*</sup> LVLE <sup>*</sup> V                                            |                                                                                                                                                      |
|                        | zuler          | 220                                                                                                                                                                  | E <sup>*</sup> IALLV <sup>*</sup> PREAAK <sup>*</sup> AADLLV <sup>*</sup> AAIGIK <sup>*</sup> GLNFAPV <sup>*</sup> LVLE <sup>*</sup> V                                            |                                                                                                                                                      |
|                        |                | 230                                                                                                                                                                  | E <sup>*</sup> IALLV <sup>*</sup> PREAAK <sup>*</sup> AADLLV <sup>*</sup> AAIGIK <sup>*</sup> GLNFAPV <sup>*</sup> LVLE <sup>*</sup> V                                            |                                                                                                                                                      |
|                        |                | 240                                                                                                                                                                  | E <sup>*</sup> IALLV <sup>*</sup> PREAAK <sup>*</sup> AADLLV <sup>*</sup> AAIGIK <sup>*</sup> GLNFAPV <sup>*</sup> LVLE <sup>*</sup> V                                            |                                                                                                                                                      |
|                        |                | 250                                                                                                                                                                  | E <sup>*</sup> IALLV <sup>*</sup> PREAAK <sup>*</sup> AADLLV <sup>*</sup> AAIGIK <sup>*</sup> GLNFAPV <sup>*</sup> LVLE <sup>*</sup> V                                            |                                                                                                                                                      |
|                        |                | 260                                                                                                                                                                  | E <sup>*</sup> IALLV <sup>*</sup> PREAAK <sup>*</sup> AADLLV <sup>*</sup> AAIGIK <sup>*</sup> GLNFAPV <sup>*</sup> LVLE <sup>*</sup> V                                            |                                                                                                                                                      |
|                        |                | 270                                                                                                                                                                  | E <sup>*</sup> IALLV <sup>*</sup> PREAAK <sup>*</sup> AADLLV <sup>*</sup> AAIGIK <sup>*</sup> GLNFAPV <sup>*</sup> LVLE <sup>*</sup> V                                            |                                                                                                                                                      |
|                        |                |                                                                                                                                                                      |                                                                                                                                                                                   |                                                                                                                                                      |

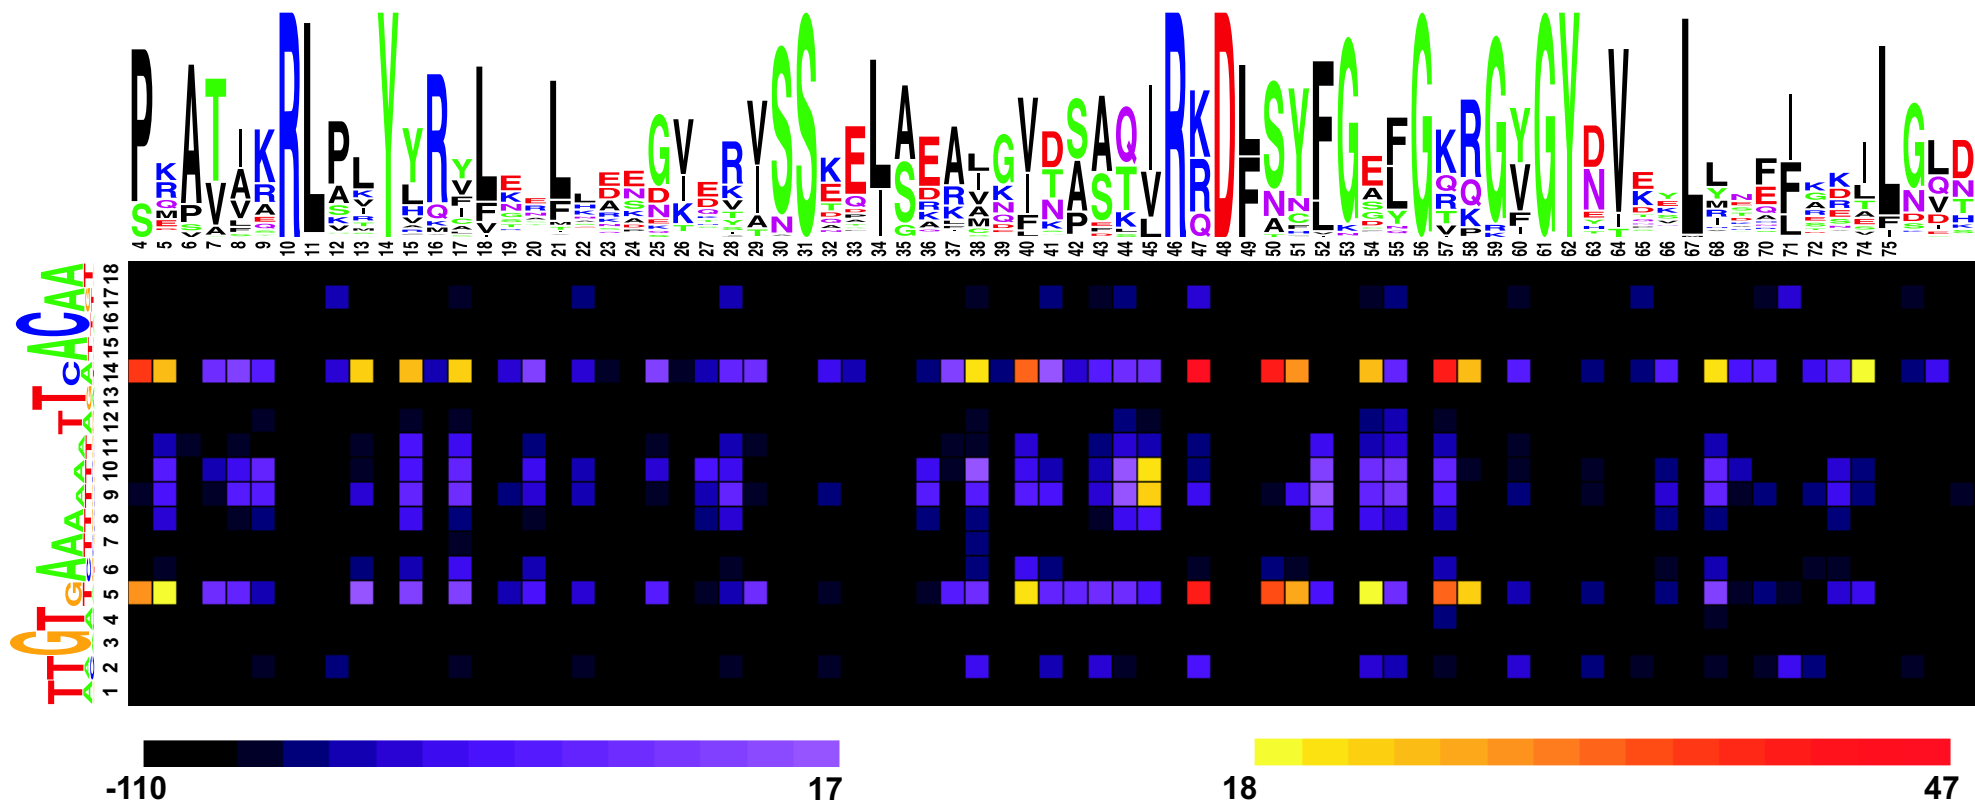

**Figure S3. Heatmap of correlations between amino acid and nucleotide pairs for Rex proteins and their operator sites.**

Sequence logos of Rex DNA-binding domains and operator DNAs are displayed above and to the left of the heatmap, respectively. The total height of the symbols in each position equals the positional information content, whereas the height of individual symbols is proportional to the positional amino acid/nucleotide frequency. The correlation scores are color ramped from yellow to red for amino acid nucleotide pairs with statistical significance greater than automatically defined threshold. 26 significantly correlated pairs of residues/nucleotides correspond to 16 amino acid positions in Rex proteins and 4 nucleotide positions in DNA operators.

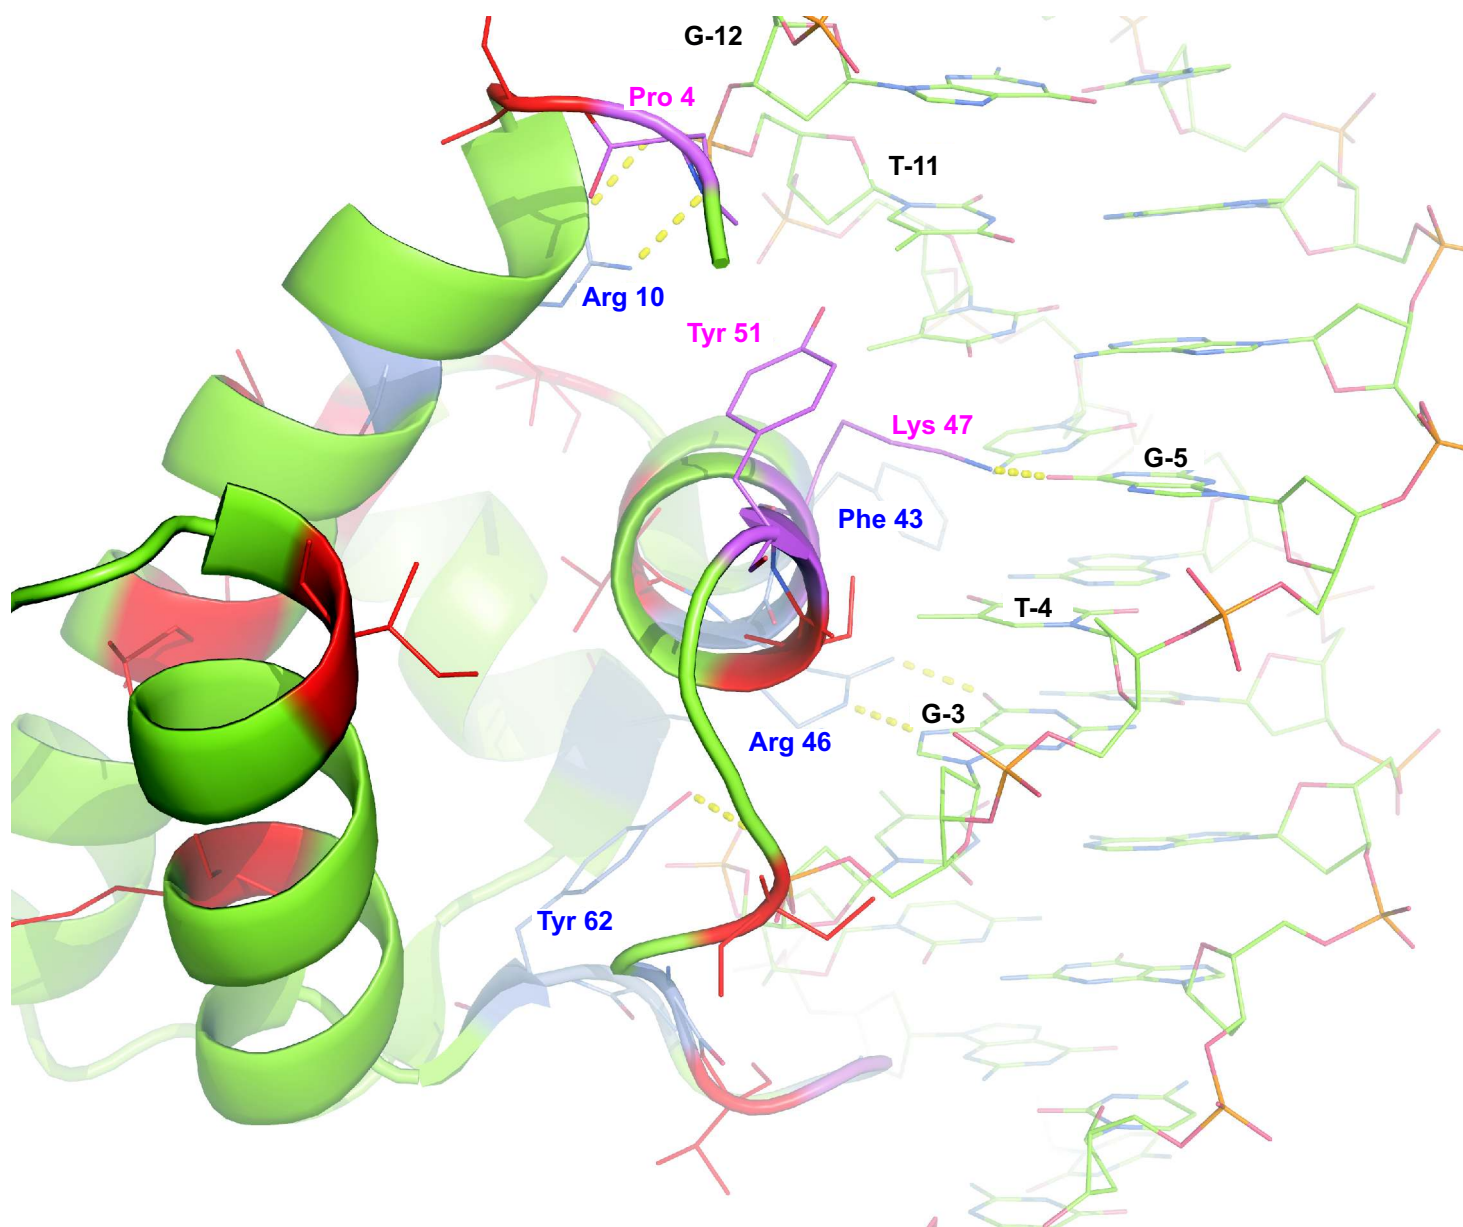

**Figure S4. Correlated residues on the structure of Rex regulator from *Thermus aquaticus* (3IKT).** Correlated residues are shown in red; residues contacting with DNA are in blue; correlated residues that are in contact with DNA are in magenta. Some hydrogen bonds are shown by yellow dashes.

**Figure S5. Multiple alignments of upstream regions of Rex regulated genes in *Thermotoga* spp.**

Candidate Rex-binding sites are highlighted in yellow. Candidate promoter elements (-35 and -10 boxes) are underlined. Transcription start sites and translation initiation codons are in red. Genome abbreviations are *Thermotoga maritima* MSB8 (TM), *Thermotoga neapolitana* DSM 4359 (CTN), *Thermotoga petrophila* RKU-1 (Tpet), *Thermotoga naphthophila* RKU-10 (Tnap), *Thermotoga* sp. RQ2 (TRQ2).

**sat (TM1400) upstream region**

```

-35          -10          TSS
TM1400      TGTTTACACCATCAATGGTCGTTGTATAATATTCCAACACCTCTCAAGATTATAGCAAACAGA-TTTTTGCTTTCTCGTTC-----CTTTTGATAAAATATGCTTCATCCG
CTN_1191    TGTTTACCTCCCTGTGGATCGTTGTATAATATTCCAACATCTTCCAAAATTATAGCAA-----TTCGGAACACACCTTCGGGAGCTTTTGATAAAATATGCTTCACTGA
Tpet_1383   TGTTTACACTGTTCGATGGCCATTGTATAATATTCCAACACCTCTCAAGATTATAGCAAACAGATTTTTTGGTTTCTCGTCT-----CTTTTGATAAAATATGCTTCATCCG
TRQ2_1429   TGTTTACACCATCAATGGTCGTTGTATAATATTCCAACACCTCTCAAGATTATAGCAAACAGA-TTTTTGCTTTCTCGTTC-----CTTTTGATAAAATATGCTTCATCCG
Tnap_1403   TGTTTACACCATCGATGGCCATTGTATAATATTCCAACACCTCTCAAGATTATAGCAAACAGATTTTTTGGTTTCTCGTTC-----CTTTTGATAAAATATGCTTCATCCG
*****          * * ***** ** *** ***** ** * * *****

                Rex-site                                start
TM1400      TCTGTAAAAATTCTGGTAGTATAATTAGTTAAAAAATAACAAGCACCACCATCCTGGAAAGGGGGAGTTCCATG
CTN_1191    TTTGTAAAAATACCGTGGTATAATTAGTTAAAAAATAACAAGCACCACCATCCTGGAAAGGGGGAGTTCCATG
Tpet_1383   TCTGTAAAAATTCTGGTAGTATAATTAGTTAAAAAATAACAAGCACCACCATCCTGGAAAGGGGGAGTTCCATG
TRQ2_1429   TCTGTAAAAATTCTGGTAGTATAATTAGTTAAAAAATAACAAGCACCACCATCCTGGAAAGGGGGAGTTCCATG
Tnap_1403   TCTGTAAAAATTCTGGTAGTATAATTAGTTAAAAAATAACAAGCACCATCATCCTGGAAAGGGGGAGTTCCATG
* ***** * *** ***** *****

```

**TM1586 upstream region**

```

                Rex-site
-35          -10          TSS
TM1586      TTTTGGAAATTCGTCTTCGAAAAGAGTAAAATATTTCACAAGGAACGACCTGGTTCCCGTGCTCTCGTAGAGTTCCTCGGGAAAATCCACCGAGAGCGGCACAAGATACAGGAAA
Tnap_1222   TTTTGGAAATTCGTCTTCGAAAAGAGTAAAATATTTCACAAGGAACGACCTGGTTCCCGTGCTCTCGTAGAGTTCCTCGGGAAAATCCACCGAGAGCGGCACAAGATACAGGAAA
Tpet_1206   TTTTGGAAATTCGTCTTCGAAAAGAGTAAAATATTTCACAAGGAACGACCTGGTTCCCGTGCTCTCGTAGAGTTCCTCGGGAAAATCCACCGAGAGCGGCACAAGATACAGGAAA
TRQ2_1249   TTTTGGAAATTCGTCTTCGAAAAGAGTAAAATATTTCACAAGGAACGACCTGGTTCCCGTGCTCTCGTAGAGTTCCTCGGGAAAATCCACCGAGAGCGGCACAAGATACAGGAAA
*****

                start
TM1586      TCCCCAAAAGAAATTGAAAGCAGAACAGAAACAATCAAAAAGCCAGTGATTTTCTCACGTCGCTCACCCCGGAGGTGGTAGAGGTG
Tnap_1222   GATCCAAAAGAAATTGAAAGCAGAACAGAAACAATCAAAAAGCCAGTGATTTTCTCACGTCGCTCACCCCGGAGGTGGTAGAGGTG
Tpet_1206   GATCCAAAAGAAATTGAAAGCAGAACAGAAACAATCAAAAAGCCAGTGATTTTCTCACGTCGCTCACCCCGGAGGTGGTAGAGGTG
TRQ2_1249   TCCCCAAAAGAAATTGAAAGCAGAACAGAAACAATCAAAAAGCCAGTGATTTTCTCACGTCGCTCACCCCGGAGGTGGTAGAGGTG
*****

```

**gldA (TM0423) upstream region**

```

-35 Rex-site -10 TSS start
TM0423      CTTCGTGAAAAATTTAACAAATTAAGGTTGATAATAATGGTAGGGAGGTGATAATCATG
CTN_0247    CATTGTGAAATACGTAACATGTAGGTTTAAAATGGAACCGGGAGGTGAT-GTGATG
Tpet_0498   CTTCGTGAAAAATTTAACAAATTAAGGTTGATAATAATGGTAGGAGGTGATAATCATG
TRQ2_0522   CTTCGTGAAAAATTTAACAAATTAAGGTTGATAATAATGGTAGGAGGTGATAATCATG
* * ***** * ***** ** ***** * *** ***** * ***

```





### TM1420 upstream region

```

-35          Rex1-site      -10          TSS          Rex-site          start
TM1420      TTTACAAAACTTGTGAAGTAGGTAACAACATAGAGCATTCCTTGACTTCTCCTGAAAATAGTGAAAAATATAACGTGAAAAGGTTACGATTTGAAAGGAACGATGGACATG
Tpet_1372   TTTACAAAACTTGTGAAGTAGGTAACAACATATATCACTCCCTTGACTTCTCCTGAAAATAGTGAAAAATATAACGTGAAAAGGTTACGATTTGAAAGGAACGATGGACATG
Tnap_1390   TTTACAAAACTTGTGAAGTAGGTAACAACATATATCACTCCCTTGACTTCTCCTGAAAATAGTGAAAAATATAACGTGAAAAGGTTACGATTTGAAAGGAACGATGGACATG
TRQ2_1314   TTTACAAAACTTGTGAAGTAGGTAACAACATATATCACTCCCTTGACTTCTCCTGAAAATAGTGAAAAATATAACGTGAAAAGGTTACGATTTGAAAGGAACGATGGACATG
CTN_1072    TTTACTTTTCTTTGTGAATACAGTAACAACATGGTGTACTCCCTTGACTTTTGTCGAAAAATAGTGAAAAATATAACGTGAAAAGGTTACGATTTGAGGAAAACCACCGATG
          *****          *****          * *****          *****          *          *****          ***

```

### TM1814 upstream region

```

-35          -10          TSS          Rex-site          start
TM1814      AAAAAAAGGATAG-----TATGCAA-----AGAAAATTTTAATGATAAAATTATCACAAAGACATCCAAGGGGGAAACAGTATG
Tpet_1099   AAAAAAAGGATAG-----TATGCAA-----AGAAAATTTTAATGATAAAATTATCACAAAGACATCCAAGGGGGAAACAGTATG
Tnap_1013   AAAAAAAGGATAG-----TATGCAA-----AGAAAATTTTAATGATAAAATTATCACAAAGACATCCAAGGGGGAAACAGTATG
TRQ2_1007   AAAAAAAGGATAG-----TATGCAA-----AGAAAATTTTAATGATAAAATTATCACAAAGACATCCAAGGGGGAAACAGTATG
CTN_0700    AAAGTACGGAGGGAGGGCCTTCCCTTCTTACGTGCAACTTATTACCGTTTCTTGGTGGACAAAATGATAAAATTATCACAA-----AAAGGGGGTGTGGTATG
          *** * *** *          *****          * *          *****          ** ****          *****

```

### TM0179 upstream region

```

-35          Rex-site      -10          TSS          start
TM0179      TTTTTTATAGATCACCTTTTGTTATAATAGTAACAAGGGGGTGATCTCGTG
CTN_0508    TCTTTCAGAGCCCTTTTGTTATAATGATATCAAGGGGGTGATCCAGTG
Tnap_0810   TTTTTTATAGATCACA-TTTTGTTATAATAGTAACAAGGGGGTGATCTCATG
Tpet_0745   TTTTTTATAGATCACCTTTTGTTATAATAGTAACAAGGGGGTGATATCGTG
TRQ2_0769   TTTTTTATAGATCACCTTTTGTTATAATAGTAACAAGGGGGTGATCTCGTG
          * *** *          * *          *****          ** *****          **

```

### TM0983 upstream region

```

-35          Rex-site      -10          TSS          Rex-site          start
TM0983      ATATCGTAATATTATTCAACGTCTATGTAACATTAGAATATTATTTTCACGAGGATTGAGA-TTTTTTTCACAAAAACTCAAGGGGAGGTGTGCAGTATG
Tpet_1758   ATATCGTAACATTATTCAACGTCTATGTAACATTAGAATATTATTTTCACGAGGATTGAGA-TTTTTTTCACAAAAACTCAAGGGGAGGTGTGCGGTATG
TRQ2_1812   ATATCGTAACATTATTCAACGTCTATGTAACATTAGAATATTATTTTCACGAGGATTGAGA-TTTTTTTCACAAAAACTCAAGGGGAGGTGTGCGGTATG
Tnap_1770   ATATCGTAACATTATTCAACGTCTATGTAACATTAGAATATTATTTTCACGAGGATTGAGA-TTTTTTTCACAAAAACTCAAGGGGAGGTGTGCGGTATG
CTN_1595    ATATCGTAATATTATTCAACGTCTATGTAACATTAGAATATTATTTTCACGAGGATTGAGA-TTTTTTTCACAAAAACTCAAGGGGAGGTGTGCAGTATG
          *****          *****          *****          *****          *****          *****

```

|              |    |    |    |    |    |
|--------------|----|----|----|----|----|
| TM1427(Rex1) | -  | -  | -  | +  | +  |
| TM0169 (Rex) | -  | +  | +  | -  | -  |
| DNA          | +  | +  | +  | +  | +  |
| T, °C        | 37 | 60 | 37 | 60 | 37 |

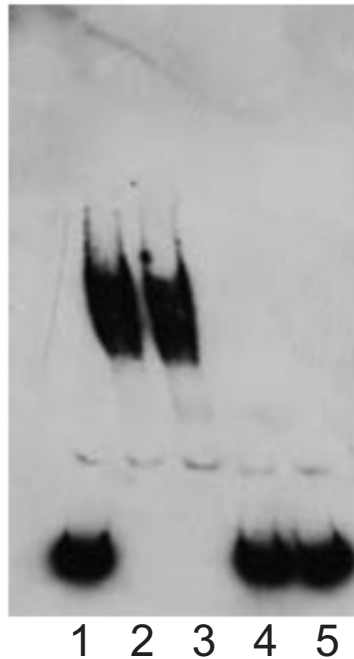

**Figure S6.** Assessment of interaction between the *T. maritima* Rex (TM0169) and Rex1 (TM1427) proteins with 200-bp DNA fragment containing the promoter region of *TM1420* gene using EMSA.. Concentrations of Rex and Rex1 proteins are 100nM and 1μM, respectively. Concentration of DNA fragment is 0.03nM.

**Table S1.** Synthetic oligonucleotides containing the *Thermotoga* Rex binding regions used in the binding assays.

| Target gene                          | Fragment used for EMSA or FPA <sup>1)</sup> |
|--------------------------------------|---------------------------------------------|
| TM0012 ( <i>hycA</i> )               | gggggATGTGAAAAAATATCAGgggg <b>t</b>         |
| TM0179                               | gggggTTGTTATAATAGTAACAAGgggg <b>t</b>       |
| TM0201 ( <i>hycD</i> ) <sup>2)</sup> | gggggTTGAGAAATTTATCACAAgggg <b>t</b>        |
| TM0227 ( <i>hycE</i> )               | gggggTTGTGAAATTTTGGACGAGgggg <b>t</b>       |
| TM0379 ( <i>noxE</i> )               | gggggTCGTGAAAAATTTCTCTTgggg <b>t</b>        |
| TM0423 ( <i>gldA</i> )               | gggggTCGTGAAAAATTTAACAAGgggg <b>t</b>       |
| TM0686 ( <i>dnaX</i> )               | gggggTAGTTATTTTTTTCACGAGgggg <b>t</b>       |
| TM0983                               | gggggTTGAGATTTTTTTCACAAGgggg <b>t</b>       |
| TM1400 ( <i>sat</i> )                | gggggTAGTTAAAAAATAACAAGgggg <b>t</b>        |
| TM1420                               | gggggTAGTGAAAAATATAACGTgggg <b>t</b>        |
| TM1586                               | gggggGAGTAAAATATTTCACAAgggg <b>t</b>        |
| TM1814                               | gggggATGATAAAATTATCACAAgggg <b>t</b>        |
| TRQ2_0578-1 ( <i>adhE</i> )          | gggggGTGAGAAATTTTCACAAGgggg <b>t</b>        |
| TRQ2_0578-2 ( <i>adhE</i> )          | gggggTTGTTATGAAATTCACAAGgggg <b>t</b>       |
| TM0808 ( <i>chiR</i> ) <sup>3)</sup> | gggggAAGTTGTTTGCGGCATGCAACTAgggg <b>t</b>   |

<sup>1)</sup> Rex-binding sites are capitalized. For each DNA fragment, two complimentary single-stranded oligonucleotides have been synthesized by IDT, at that one of these fragments (5'-3' shown here) was labeled by either biotin or 6-carboxyfluorescein at 3' end (marked by blue and red, respectively). All analyzed Rex-binding sites are from *Thermotoga maritima* MSB8, except two sites marked TRQ2\_0578 that are from *Thermotoga* sp. RQ2.

<sup>2)</sup> Fragment was used for both EMSA and FPA, all other fragments were used only for FPA.

<sup>3)</sup> Negative control DNA fragment, contains a binding site of the chitobiose responsive regulator ChiR (TM0808).

Table S2. Distribution of Rex orthologs in Bacteria

| # | Phylum         | Class            | Order           | Family                | Organism name                         | rex gene locus_tag | Reconstructed regulog in RegPrecise |
|---|----------------|------------------|-----------------|-----------------------|---------------------------------------|--------------------|-------------------------------------|
| 1 | Acidobacteria  | Solibacteres     | Solibacterales  | Solibacteraceae       | Solibacter usitatus Ellin6076         | Acid_6962          | -                                   |
| 2 | Actinobacteria | Actinobacteria   | Actinomycetales | Intrasporangiaceae    | Janibacter sp. HTCC2649               | JNB_09294          | Rex - Actinomycetales               |
|   | Actinobacteria | Actinobacteria   | Actinomycetales | Nakamurellaceae       | Nakamurella multipartita DSM 44233    | Namu_0919          | Rex - Actinomycetales               |
|   | Actinobacteria | Actinobacteria   | Actinomycetales | Nocardiaceae          | Rhodococcus erythropolis PR4          | RER_16400          | Rex - Actinomycetales               |
|   | Actinobacteria | Actinobacteria   | Actinomycetales | Nocardiaceae          | Rhodococcus opacus B4                 | ROP_17260          | Rex - Actinomycetales               |
|   | Actinobacteria | Actinobacteria   | Actinomycetales | Pseudonocardiaceae    | Saccharomonospora viridis DSM 43017   | Svir_02840         | Rex - Actinomycetales               |
|   | Actinobacteria | Actinobacteria   | Actinomycetales | Pseudonocardiaceae    | Saccharopolyspora erythraea NRRL 2338 | SACE_6947          | Rex - Actinomycetales               |
|   | Actinobacteria | Actinobacteridae | Actinomycetales | Acidothermaceae       | Acidothermus cellulolyticus 11B       | Acel_0239          | Rex - Actinomycetales               |
|   | Actinobacteria | Actinobacteridae | Actinomycetales | Actinosynnemataceae   | Actinosynnema mirum DSM 43827         | Amir_6731          | Rex - Actinomycetales               |
|   | Actinobacteria | Actinobacteridae | Actinomycetales | Brevibacteriaceae     | Brevibacterium linens BL2             | BlinB01001404      | -                                   |
|   | Actinobacteria | Actinobacteridae | Actinomycetales | Catenulisporineae     | Catenulispora acidiphila DSM 44928    | Caci_8327          | -                                   |
|   | Actinobacteria | Actinobacteridae | Actinomycetales | Cellulomonadaceae     | Cellulomonas flavigena DSM 20109      | Cfla_2738          | -                                   |
|   | Actinobacteria | Actinobacteridae | Actinomycetales | Dermacoccaceae        | Dermacoccus sp. Ellin185              | HMPREF0321_2048    | -                                   |
|   | Actinobacteria | Actinobacteridae | Actinomycetales | Frankiaceae           | Frankia sp. Ccl3                      | Francci3_0484      | Rex - Actinomycetales               |
|   | Actinobacteria | Actinobacteridae | Actinomycetales | Frankiaceae           | Frankia sp. EAN1pec                   | Franean1_6132      | Rex - Actinomycetales               |
|   | Actinobacteria | Actinobacteridae | Actinomycetales | Geodermatophilaceae   | Geodermatophilus obscurus DSM 43160   | Gobs_4581          | -                                   |
|   | Actinobacteria | Actinobacteridae | Actinomycetales | Glycomycetaceae       | Stackebrandtia nassauensis DSM 44728  | Snas_5695          | -                                   |
|   | Actinobacteria | Actinobacteridae | Actinomycetales | Gordoniaceae          | Gordonia bronchialis DSM 43247        | Gbro_1012          | -                                   |
|   | Actinobacteria | Actinobacteridae | Actinomycetales | Kineosporiaceae       | Kineococcus radiotolerans SRS30216    | Krad_0616          | -                                   |
|   | Actinobacteria | Actinobacteridae | Actinomycetales | Micrococcaceae        | Arthrobacter aurescens TC1            | AAur_3294          | Rex - Actinomycetales               |
|   | Actinobacteria | Actinobacteridae | Actinomycetales | Micrococcaceae        | Arthrobacter sp. FB24                 | Arth_3297          | Rex - Actinomycetales               |
|   | Actinobacteria | Actinobacteridae | Actinomycetales | Micromonosporaceae    | Micromonospora aurantiaca ATCC 27029  | Micau_5643         | -                                   |
|   | Actinobacteria | Actinobacteridae | Actinomycetales | Nocardiaceae          | Nocardia farcinica IFM 10152          | nfa51710           | Rex - Actinomycetales               |
|   | Actinobacteria | Actinobacteridae | Actinomycetales | Nocardiaceae          | Nocardioides sp. JS614                | Noca_0493          | Rex - Actinomycetales               |
|   | Actinobacteria | Actinobacteridae | Actinomycetales | Nocardiaceae          | Rhodococcus sp. RHA1                  | RHA1_ro02054       | Rex - Actinomycetales               |
|   | Actinobacteria | Actinobacteridae | Actinomycetales | Nocardioidaceae       | Nocardioides sp. JS614                | Noca_0493          | -                                   |
|   | Actinobacteria | Actinobacteridae | Actinomycetales | Nocardiopsaceae       | Thermobifida fusca YX                 | Tfu_2734           | -                                   |
|   | Actinobacteria | Actinobacteridae | Actinomycetales | Promicromonosporaceae | Xylanimonas cellulositytica DSM 15894 | Xcel_0440          | -                                   |
|   | Actinobacteria | Actinobacteridae | Actinomycetales | Sanguibacteraceae     | Sanguibacter keddieii DSM 10542       | Sked_07160         | -                                   |
|   | Actinobacteria | Actinobacteridae | Actinomycetales | Streptomycetaceae     | Streptomyces avermitilis MA-4680      | SAV_4738           | Rex - Actinomycetales               |
|   | Actinobacteria | Actinobacteridae | Actinomycetales | Streptomycetaceae     | Streptomyces coelicolor A3(2)         | SCO3320            | Rex - Actinomycetales               |
|   | Actinobacteria | Actinobacteridae | Actinomycetales | Streptomycetaceae     | Streptomyces griseus NBRC 13350       | SGR_4154           | Rex - Actinomycetales               |
|   | Actinobacteria | Actinobacteridae | Actinomycetales | Streptosporangiaceae  | Streptosporangium roseum DSM 43021    | Sros_0547          | -                                   |
|   | Actinobacteria | Actinobacteridae | Actinomycetales | Thermomonosporaceae   | Thermomonospora curvata DSM 43183     | Tcur_4441          | -                                   |
| 3 | Bacteroidetes  | Bacteroidetes    | Bacteroidales   | Bacteroidaceae        | Bacteroides fragilis NCTC 9343        | BF3782             | -                                   |
|   | Bacteroidetes  | Bacteroidetes    | Bacteroidales   | Bacteroidaceae        | Bacteroides thetaiotaomicron VPI-5482 | BT3882             | -                                   |
|   | Bacteroidetes  | Bacteroidetes    | Bacteroidales   | Bacteroidaceae        | Bacteroides vulgatus ATCC 8482        | BVU_1637           | -                                   |
|   | Bacteroidetes  | Bacteroidetes    | Bacteroidales   | Porphyromonadaceae    | Parabacteroides distasonis ATCC 8503  | BDI_2578           | -                                   |
|   | Bacteroidetes  | Bacteroidetes    | Bacteroidales   | Porphyromonadaceae    | Porphyromonas gingivalis W83          | PG0024             | -                                   |

|   |                  |               |                  |                   |                                             |                      |                           |
|---|------------------|---------------|------------------|-------------------|---------------------------------------------|----------------------|---------------------------|
| 4 | Chloroflexi      | Chloroflexi   | Chloroflexales   | Chloroflexaceae   | Chloroflexus aggregans DSM 9485             | Cagg_0157            | Rex - Chloroflexi         |
|   | Chloroflexi      | Chloroflexi   | Chloroflexales   | Chloroflexaceae   | Chloroflexus sp. Y-400-fl                   | Chy400_3940          | Rex - Chloroflexi         |
|   | Chloroflexi      | Chloroflexi   | Chloroflexales   | Chloroflexaceae   | Herpetosiphon aurantiacus ATCC 23779        | Haur_4427            | Rex - Chloroflexi         |
|   | Chloroflexi      | Chloroflexi   | Chloroflexales   | Chloroflexaceae   | Roseiflexus castenholzii DSM 13941          | Rcas_1392            | Rex - Chloroflexi         |
|   | Chloroflexi      | Chloroflexi   | Chloroflexales   | Chloroflexaceae   | Roseiflexus sp. RS-1                        | RoseRS_4103          | Rex - Chloroflexi         |
| 5 | Deinococcus-Ther | Deinococci    | Deinococcales    | Deinococcaceae    | Deinococcus deserti VCD115                  | Deide_14030          | Rex - Deinococcus-Thermus |
|   | Deinococcus-Ther | Deinococci    | Deinococcales    | Deinococcaceae    | Deinococcus geothermalis DSM 11300          | Dgeo_0630            | Rex - Deinococcus-Thermus |
|   | Deinococcus-Ther | Deinococci    | Deinococcales    | Deinococcaceae    | Deinococcus radiodurans R1                  | DR0939               | Rex - Deinococcus-Thermus |
|   | Deinococcus-Ther | Deinococci    | Thermales        | Thermaceae        | Thermus aquaticus Y51MC23                   | Taq_4998             | Rex - Deinococcus-Thermus |
|   | Deinococcus-Ther | Deinococci    | Thermales        | Thermaceae        | Thermus thermophilus HB27                   | TTC1293              | Rex - Deinococcus-Thermus |
| 6 | Dictyoglomi      | Dictyoglomia  | Dictyoglomales   | Dictyoglomaceae   | Dictyoglomus thermophilum H-6-12            | DICTH_0414           | -                         |
| 7 | Elusimicrobia    | Elusimicrobia | Elusimicrobiales | Elusimicrobiaceae | Elusimicrobium minutum Pei191               | Emin_0756            | -                         |
| 8 | Firmicutes       | Bacilli       | Bacillales       | Bacillaceae       | Anoxybacillus flavithermus WK1              | Aflv_0208            | Rex - Bacillales          |
|   | Firmicutes       | Bacilli       | Bacillales       | Bacillaceae       | Bacillus amyloliquefaciens FZB42            | RBAM_006420          | Rex - Bacillales          |
|   | Firmicutes       | Bacilli       | Bacillales       | Bacillaceae       | Bacillus cereus ATCC 14579                  | BC0291               | Rex - Bacillales          |
|   | Firmicutes       | Bacilli       | Bacillales       | Bacillaceae       | Bacillus clausii KSM-K16                    | ABC0873              | Rex - Bacillales          |
|   | Firmicutes       | Bacilli       | Bacillales       | Bacillaceae       | Bacillus halodurans C-125                   | BH0551               | Rex - Bacillales          |
|   | Firmicutes       | Bacilli       | Bacillales       | Bacillaceae       | Bacillus licheniformis ATCC 14580           | BLI00618             | Rex - Bacillales          |
|   | Firmicutes       | Bacilli       | Bacillales       | Bacillaceae       | Bacillus pumilus SAFR-032                   | BPUM_0528            | Rex - Bacillales          |
|   | Firmicutes       | Bacilli       | Bacillales       | Bacillaceae       | Bacillus subtilis 168                       | BSU05970             | Rex - Bacillales          |
|   | Firmicutes       | Bacilli       | Bacillales       | Bacillaceae       | Geobacillus kaustophilus HTA426             | GK0242               | Rex - Bacillales          |
|   | Firmicutes       | Bacilli       | Bacillales       | Bacillaceae       | Oceanobacillus iheyensis HTE831             | OB0652               | Rex - Bacillales          |
|   | Firmicutes       | Bacilli       | Bacillales       | Paenibacillaceae  | Paenibacillus sp. JDR-2                     | Pjdr2_2450           | Rex - Bacillales          |
|   | Firmicutes       | Bacilli       | Bacillales       | Staphylococcaceae | Macrocococcus caseolyticus JCSC5402         | MCCL_1721            | Rex - Staphylococcus      |
|   | Firmicutes       | Bacilli       | Bacillales       | Staphylococcaceae | Staphylococcus aureus N315                  | SA1851               | Rex - Staphylococcus      |
|   | Firmicutes       | Bacilli       | Bacillales       | Staphylococcaceae | Staphylococcus capitis SK14                 | STACA0001_0533       | Rex - Staphylococcus      |
|   | Firmicutes       | Bacilli       | Bacillales       | Staphylococcaceae | Staphylococcus carnosus TM300               | Sca_1553             | Rex - Staphylococcus      |
|   | Firmicutes       | Bacilli       | Bacillales       | Staphylococcaceae | Staphylococcus epidermidis ATCC 12228       | SEI1647              | Rex - Staphylococcus      |
|   | Firmicutes       | Bacilli       | Bacillales       | Staphylococcaceae | Staphylococcus haemolyticus JCSC1435        | SH0986               | Rex - Staphylococcus      |
|   | Firmicutes       | Bacilli       | Bacillales       | Staphylococcaceae | Staphylococcus saprophyticus ATCC 15305     | SSP0833              | Rex - Staphylococcus      |
|   | Firmicutes       | Bacilli       | Lactobacillales  | Enterococcaceae   | Enterococcus faecalis V583                  | EF2638, EF2933       | -                         |
|   | Firmicutes       | Bacilli       | Lactobacillales  | Lactobacillaceae  | Lactobacillus acidophilus NCFM              | LBA0398              | Rex - Lactobacillaceae    |
|   | Firmicutes       | Bacilli       | Lactobacillales  | Lactobacillaceae  | Lactobacillus brevis ATCC 367               | LVIS_0616            | Rex - Lactobacillaceae    |
|   | Firmicutes       | Bacilli       | Lactobacillales  | Lactobacillaceae  | Lactobacillus casei ATCC 334                | LSEI_2245, LSEI_1250 | Rex - Lactobacillaceae    |
|   | Firmicutes       | Bacilli       | Lactobacillales  | Lactobacillaceae  | Lactobacillus delbrueckii subsp. bulgaricus | LBUL_1498            | Rex - Lactobacillaceae    |
|   | Firmicutes       | Bacilli       | Lactobacillales  | Lactobacillaceae  | Lactobacillus fermentum IFO 3956            | LAF_0324             | Rex - Lactobacillaceae    |
|   | Firmicutes       | Bacilli       | Lactobacillales  | Lactobacillaceae  | Lactobacillus helveticus DPC 4571           | lhv_0416             | Rex - Lactobacillaceae    |
|   | Firmicutes       | Bacilli       | Lactobacillales  | Lactobacillaceae  | Lactobacillus johnsonii NCC 533             | LJ0455               | Rex - Lactobacillaceae    |
|   | Firmicutes       | Bacilli       | Lactobacillales  | Lactobacillaceae  | Lactobacillus plantarum WCFS1               | lp_0725              | Rex - Lactobacillaceae    |
|   | Firmicutes       | Bacilli       | Lactobacillales  | Lactobacillaceae  | Lactobacillus reuteri JCM 1112              | LAR_0341             | Rex - Lactobacillaceae    |
|   | Firmicutes       | Bacilli       | Lactobacillales  | Lactobacillaceae  | Lactobacillus rhamnosus GG                  | LGG_01260, LGG_02247 | Rex - Lactobacillaceae    |
|   | Firmicutes       | Bacilli       | Lactobacillales  | Lactobacillaceae  | Lactobacillus sakei 23K                     | LSA0356, LSA0848     | Rex - Lactobacillaceae    |

|                   |                   |                            |                                |                                                 |                                |                              |   |
|-------------------|-------------------|----------------------------|--------------------------------|-------------------------------------------------|--------------------------------|------------------------------|---|
| Firmicutes        | Bacilli           | Lactobacillales            | Lactobacillaceae               | Lactobacillus salivarius UCC118                 | LSL_1214                       | Rex - Lactobacillaceae       |   |
| Firmicutes        | Bacilli           | Lactobacillales            | Lactobacillaceae               | Pediococcus pentosaceus ATCC 25745              | PEPE_1470                      | Rex - Lactobacillaceae       |   |
| Firmicutes        | Bacilli           | Lactobacillales            | Leuconostocaceae               | Leuconostoc mesenteroides ATCC 8293             | LEUM_1774                      | Rex - Lactobacillaceae       |   |
| Firmicutes        | Bacilli           | Lactobacillales            | Leuconostocaceae               | Oenococcus oeni PSU-1                           | OEOE_1398                      | Rex - Lactobacillaceae       |   |
| Firmicutes        | Bacilli           | Lactobacillales            | Streptococcaceae               | Lactococcus lactis SK11                         | LACR_1156                      | Rex - Streptococcaceae       |   |
| Firmicutes        | Bacilli           | Lactobacillales            | Streptococcaceae               | Lactococcus lactis subsp. lactis II1403         | L71932                         | Rex - Streptococcaceae       |   |
| Firmicutes        | Bacilli           | Lactobacillales            | Streptococcaceae               | Streptococcus agalactiae 2603V/R                | SAG1100                        | Rex - Streptococcaceae       |   |
| Firmicutes        | Bacilli           | Lactobacillales            | Streptococcaceae               | Streptococcus dysgalactiae subsp. equisiri      | SDEG_0880                      | Rex - Streptococcaceae       |   |
| Firmicutes        | Bacilli           | Lactobacillales            | Streptococcaceae               | Streptococcus equi MGCS10565                    | Sez_1050                       | Rex - Streptococcaceae       |   |
| Firmicutes        | Bacilli           | Lactobacillales            | Streptococcaceae               | Streptococcus gallolyticus UCN34                | GALLO_1010                     | Rex - Streptococcaceae       |   |
| Firmicutes        | Bacilli           | Lactobacillales            | Streptococcaceae               | Streptococcus gordonii CH1                      | SGO_1228                       | Rex - Streptococcaceae       |   |
| Firmicutes        | Bacilli           | Lactobacillales            | Streptococcaceae               | Streptococcus mitis B6                          | smi_1188                       | Rex - Streptococcaceae       |   |
| <b>Firmicutes</b> | <b>Bacilli</b>    | <b>Lactobacillales</b>     | <b>Streptococcaceae</b>        | <b>Streptococcus mutans UA159</b>               | <b>SMU.1053</b>                | Rex - Streptococcaceae       |   |
| Firmicutes        | Bacilli           | Lactobacillales            | Streptococcaceae               | Streptococcus pneumoniae TIGR4                  | SP_1090                        | Rex - Streptococcaceae       |   |
| Firmicutes        | Bacilli           | Lactobacillales            | Streptococcaceae               | Streptococcus pyogenes M1 GAS                   | SPY1120                        | Rex - Streptococcaceae       |   |
| Firmicutes        | Bacilli           | Lactobacillales            | Streptococcaceae               | Streptococcus sanguinis SK36                    | SSA_1216                       | Rex - Streptococcaceae       |   |
| Firmicutes        | Bacilli           | Lactobacillales            | Streptococcaceae               | Streptococcus suis 05ZYH33                      | SSU05_1069                     | Rex - Streptococcaceae       |   |
| Firmicutes        | Bacilli           | Lactobacillales            | Streptococcaceae               | Streptococcus thermophilus CNRZ1066             | str1463                        | Rex - Streptococcaceae       |   |
| Firmicutes        | Bacilli           | Lactobacillales            | Streptococcaceae               | Streptococcus uberis 0140J                      | SUB0845                        | Rex - Streptococcaceae       |   |
| Firmicutes        | Clostridia        | Clostridiales              | Clostridiaceae                 | Alkaliphilus oremlandii OHILAs                  | Clos_2464                      | Rex - Clostridiaceae         |   |
| Firmicutes        | Clostridia        | Clostridiales              | Clostridiaceae                 | Clostridium acetobutylicum ATCC 824             | CAC2713                        | Rex - Clostridiaceae         |   |
| Firmicutes        | Clostridia        | Clostridiales              | Clostridiaceae                 | Clostridium bartlettii DSM 16795                | CLOBAR_00711, CLOBAR_01830     | Rex - Clostridiaceae         |   |
| Firmicutes        | Clostridia        | Clostridiales              | Clostridiaceae                 | Clostridium beijerinckii NCIMB 8052             | Cbei_0320                      | Rex - Clostridiaceae         |   |
| Firmicutes        | Clostridia        | Clostridiales              | Clostridiaceae                 | Clostridium boltea ATCC BAA-613                 | CLOBOL_04148                   | Rex - Clostridiaceae         |   |
| Firmicutes        | Clostridia        | Clostridiales              | Clostridiaceae                 | Clostridium botulinum A str. ATCC 3502          | CBO3306                        | Rex - Clostridiaceae         |   |
| Firmicutes        | Clostridia        | Clostridiales              | Clostridiaceae                 | Clostridium butyricum 5521                      | CBY_3040                       | Rex - Clostridiaceae         |   |
| Firmicutes        | Clostridia        | Clostridiales              | Clostridiaceae                 | Clostridium cellulolyticum H10                  | Ccel_2882                      | Rex - Clostridiaceae         |   |
| Firmicutes        | Clostridia        | Clostridiales              | Clostridiaceae                 | Clostridium difficile 630                       | CD0171                         | Rex - Clostridiaceae         |   |
| Firmicutes        | Clostridia        | Clostridiales              | Clostridiaceae                 | Clostridium hiranonis DSM 13275                 | CLOHIR_00042                   | Rex - Clostridiaceae         |   |
| Firmicutes        | Clostridia        | Clostridiales              | Clostridiaceae                 | Clostridium kluyveri DSM 555                    | CKL_0453                       | Rex - Clostridiaceae         |   |
| Firmicutes        | Clostridia        | Clostridiales              | Clostridiaceae                 | Clostridium leptum DSM 753                      | CLOLEP_02947                   | Rex - Clostridiaceae         |   |
| Firmicutes        | Clostridia        | Clostridiales              | Clostridiaceae                 | Clostridium nexile DSM 1787                     | CLONEX_01590                   | Rex - Clostridiaceae         |   |
| Firmicutes        | Clostridia        | Clostridiales              | Clostridiaceae                 | Clostridium novyi NT                            | NT01CX_0475                    | Rex - Clostridiaceae         |   |
| Firmicutes        | Clostridia        | Clostridiales              | Clostridiaceae                 | Clostridium perfringens ATCC 13124              | CPF_2586                       | Rex - Clostridiaceae         |   |
| Firmicutes        | Clostridia        | Clostridiales              | Clostridiaceae                 | Clostridium phytofermentans ISDg                | Cphy_0901                      | Rex - Clostridiaceae         |   |
| Firmicutes        | Clostridia        | Clostridiales              | Clostridiaceae                 | Clostridium scindens ATCC 35704                 | CLOSCI_00613                   | Rex - Clostridiaceae         |   |
| Firmicutes        | Clostridia        | Clostridiales              | Clostridiaceae                 | Clostridium sp. SS2/1                           | CLOSS21_01144                  | Rex - Clostridiaceae         |   |
| Firmicutes        | Clostridia        | Clostridiales              | Clostridiaceae                 | Clostridium tetani E88                          | CTC02428                       | Rex - Clostridiaceae         |   |
| Firmicutes        | Clostridia        | Thermoanaerobactera        | Thermoanaerobacterales         | F Caldicellulosiruptor saccharolyticus DSM 1220 | CSac_1220                      | Rex - Thermoanaerobacterales |   |
| <b>Firmicutes</b> | <b>Clostridia</b> | <b>Thermoanaerobactera</b> | <b>Thermoanaerobacteraceae</b> | <b>Thermoanaerobacter ethanolicus CCSD1</b>     | <b>TeCCSD1DRAFT_0298</b>       | Rex - Thermoanaerobacterales |   |
| Firmicutes        | Clostridia        | Thermoanaerobactera        | Thermoanaerobacteraceae        | Thermoanaerobacter tengcongensis MB4            | TTE0543                        | Rex - Thermoanaerobacterales |   |
| 9                 | Fusobacteria      | Fusobacteria               | Fusobacteriales                | Fusobacteriaceae                                | Leptotrichia buccalis DSM 1135 | Lebu_0168                    | - |

|    |                       |                            |                           |                            |                                                   |                             |                                                  |
|----|-----------------------|----------------------------|---------------------------|----------------------------|---------------------------------------------------|-----------------------------|--------------------------------------------------|
|    | Fusobacteria          | Fusobacteria               | Fusobacteriales           | Fusobacteriaceae           | Sebaldella termitidis ATCC 33386                  | Sterm_1177                  | -                                                |
|    | Fusobacteria          | Fusobacteria               | Fusobacteriales           | Fusobacteriaceae           | Streptobacillus moniliformis DSM 12112            | Smon_0374                   | -                                                |
| 10 | Gemmatimonadet        | Gemmatimonadetes           | Gemmatimonadales          | Gemmatimonadaceae          | Gemmatimonas aurantiaca T-27                      | GAU_1881                    | -                                                |
| 11 | Lentisphaerae         | Lentisphaerae              | Lentisphaerales           | Lentisphaeraceae           | Lentisphaera araneosa HTCC2155                    | LNTAR_20783                 | -                                                |
|    | Lentisphaerae         | Lentisphaerae              | Victivallales             | Victivallaceae             | Victivallis vadensis ATCC BAA-548                 | Vvad_PD0169                 | -                                                |
|    | Lentisphaerae         | Lentisphaerae              | Victivallales             | Victivallaceae             | Victivallis vadensis ATCC BAA-548                 | Vvad_PD0204                 | -                                                |
| 12 | Proteobacteria        | Deltaproteobacteria        | Desulfobacteriales        | Desulfobacteraceae         | Desulfatibacillum alkenivorans AK-01              | Dalk_2860                   | -                                                |
|    | <b>Proteobacteria</b> | <b>Deltaproteobacteria</b> | <b>Desulfovibrionales</b> | <b>Desulfohalobiaceae</b>  | <b>Desulfohalobium retbaense DSM 5692</b>         | <b>Dret_2085</b>            | <b>Rex - Desulfovibrionales</b>                  |
|    | <b>Proteobacteria</b> | <b>Deltaproteobacteria</b> | <b>Desulfovibrionales</b> | <b>Desulfomicrobiaceae</b> | <b>Desulfomicrobium baculatum DSM 4028</b>        | <b>Dbac_2793</b>            | <b>Rex - Desulfovibrionales</b>                  |
|    | <b>Proteobacteria</b> | <b>Deltaproteobacteria</b> | <b>Desulfovibrionales</b> | <b>Desulfovibrionaceae</b> | <b>Desulfovibrio desulfuricans G20</b>            | <b>Dde_2702</b>             | <b>Rex - Desulfovibrionales</b>                  |
|    | <b>Proteobacteria</b> | <b>Deltaproteobacteria</b> | <b>Desulfovibrionales</b> | <b>Desulfovibrionaceae</b> | <b>Desulfovibrio desulfuricans subsp. desulfu</b> | <b>Ddes_2257</b>            | <b>Rex - Desulfovibrionales</b>                  |
|    | <b>Proteobacteria</b> | <b>Deltaproteobacteria</b> | <b>Desulfovibrionales</b> | <b>Desulfovibrionaceae</b> | <b>Desulfovibrio magneticus RS-1</b>              | <b>DMR_42180</b>            | <b>Rex - Desulfovibrionales</b>                  |
|    | <b>Proteobacteria</b> | <b>Deltaproteobacteria</b> | <b>Desulfovibrionales</b> | <b>Desulfovibrionaceae</b> | <b>Desulfovibrio piger ATCC 29098</b>             | <b>DESPIG_02066</b>         | <b>Rex - Desulfovibrionales</b>                  |
|    | <b>Proteobacteria</b> | <b>Deltaproteobacteria</b> | <b>Desulfovibrionales</b> | <b>Desulfovibrionaceae</b> | <b>Desulfovibrio salexigens DSM 2638</b>          | <b>Desa_3723</b>            | <b>Rex - Desulfovibrionales</b>                  |
|    | <b>Proteobacteria</b> | <b>Deltaproteobacteria</b> | <b>Desulfovibrionales</b> | <b>Desulfovibrionaceae</b> | <b>Desulfovibrio vulgaris Hildenborough</b>       | <b>DVU0916</b>              | <b>Rex - Desulfovibrionales</b>                  |
|    | <b>Proteobacteria</b> | <b>Deltaproteobacteria</b> | <b>Desulfovibrionales</b> | <b>Desulfovibrionaceae</b> | <b>Desulfovibrio vulgaris Miyazaki F</b>          | <b>DvMF_1390</b>            | <b>Rex - Desulfovibrionales</b>                  |
|    | <b>Proteobacteria</b> | <b>Deltaproteobacteria</b> | <b>Desulfovibrionales</b> | <b>Desulfovibrionaceae</b> | <b>Lawsonia intracellularis PHE/MN1-00</b>        | <b>LI1059</b>               | <b>Rex - Desulfovibrionales</b>                  |
|    | Proteobacteria        | Deltaproteobacteria        | Desulfuromonadales        | Pelobacteraceae            | Pelobacter carbinolicus DSM 2380                  | Pcar_1593                   | -                                                |
|    | Proteobacteria        | Deltaproteobacteria        | Desulfuromonadales        | Syntrophobacteraceae       | Syntrophobacter fumaroxidans MPOB                 | Sfum_1603                   | -                                                |
| 13 | Spirochaetes          | Spirochaetes               | Spirochaetales            | Brachyspiraceae            | Brachyspira murdochii DSM 12563                   | Bmur_1396                   | -                                                |
|    | Spirochaetes          | Spirochaetes               | Spirochaetales            | Spirochaetaeaceae          | Treponema denticola ATCC 35405                    | TDE1912                     | -                                                |
| 14 | Synergistetes         | Synergistia                | Synergistales             | Synergistaceae             | Aminobacterium colombiense DSM 12261              | HMPREF1705_01340            | -                                                |
|    | Synergistetes         | Synergistia                | Synergistales             | Synergistaceae             | Dethiosulfovibrio peptidovorans DSM 110C          | Dpep_1901                   | -                                                |
|    | Synergistetes         | Synergistia                | Synergistales             | Synergistaceae             | Jonquetella anthropi E3_33 E1                     | GCWU000246_01870            | -                                                |
|    | Synergistetes         | Synergistia                | Synergistales             | Synergistaceae             | Pyramidobacter piscolens W5455                    | HMPREF7215_0958             | -                                                |
|    | Synergistetes         | Synergistia                | Synergistales             | Synergistaceae             | Thermanaerovibrio acidaminovorans DSM             | Taci_1219                   | -                                                |
| 15 | <b>Thermotogae</b>    | <b>Thermotogae</b>         | <b>Thermotogales</b>      | <b>Thermotogaceae</b>      | <b>Fervidobacterium nodosum Rt17-B1</b>           | <b>Fnod_0423, Fnod_0224</b> | <b>Rex - Thermotogales, Rex1 - Thermotogales</b> |
|    | <b>Thermotogae</b>    | <b>Thermotogae</b>         | <b>Thermotogales</b>      | <b>Thermotogaceae</b>      | <b>Kosmotoga olearia TBF 19.5.1</b>               | <b>Kole_1558</b>            | <b>Rex - Thermotogales</b>                       |
|    | <b>Thermotogae</b>    | <b>Thermotogae</b>         | <b>Thermotogales</b>      | <b>Thermotogaceae</b>      | <b>Petrotoga mobilis SJ95</b>                     | <b>Pmob_0343</b>            | <b>Rex - Thermotogales</b>                       |
|    | <b>Thermotogae</b>    | <b>Thermotogae</b>         | <b>Thermotogales</b>      | <b>Thermotogaceae</b>      | <b>Thermosipho africanus TCF52B</b>               | <b>THA_1697, THA_788</b>    | <b>Rex - Thermotogales, Rex1 - Thermotogales</b> |
|    | <b>Thermotogae</b>    | <b>Thermotogae</b>         | <b>Thermotogales</b>      | <b>Thermotogaceae</b>      | <b>Thermosipho melanesiensis BI429</b>            | <b>Tmel_1209, Tmel_0489</b> | <b>Rex - Thermotogales, Rex1 - Thermotogales</b> |
|    | <b>Thermotogae</b>    | <b>Thermotogae</b>         | <b>Thermotogales</b>      | <b>Thermotogaceae</b>      | <b>Thermotoga lettingae TMO</b>                   | <b>Tlet_0332, Tlet_0951</b> | <b>Rex - Thermotogales, Rex1 - Thermotogales</b> |
|    | <b>Thermotogae</b>    | <b>Thermotogae</b>         | <b>Thermotogales</b>      | <b>Thermotogaceae</b>      | <b>Thermotoga maritima MSB8</b>                   | <b>TM0169, TM1427</b>       | <b>Rex - Thermotogales, Rex1 - Thermotogales</b> |
|    | <b>Thermotogae</b>    | <b>Thermotogae</b>         | <b>Thermotogales</b>      | <b>Thermotogaceae</b>      | <b>Thermotoga naphthophila RKU-10</b>             | <b>Tnap_0799, Tnap_1384</b> | <b>Rex - Thermotogales, Rex1 - Thermotogales</b> |
|    | <b>Thermotogae</b>    | <b>Thermotogae</b>         | <b>Thermotogales</b>      | <b>Thermotogaceae</b>      | <b>Thermotoga neapolitana DSM 4359</b>            | <b>CTN_0518, CTN_1066</b>   | <b>Rex - Thermotogales, Rex1 - Thermotogales</b> |
|    | <b>Thermotogae</b>    | <b>Thermotogae</b>         | <b>Thermotogales</b>      | <b>Thermotogaceae</b>      | <b>Thermotoga petrophila RKU-1</b>                | <b>Tpet_0756, Tpet_1366</b> | <b>Rex - Thermotogales, Rex1 - Thermotogales</b> |
|    | <b>Thermotogae</b>    | <b>Thermotogae</b>         | <b>Thermotogales</b>      | <b>Thermotogaceae</b>      | <b>Thermotoga sp. RQ2</b>                         | <b>TRQ2_0779, TRQ2_1320</b> | <b>Rex - Thermotogales, Rex1 - Thermotogales</b> |
| 16 | Verrucomicrobia       | Spartobacteria             | -                         | -                          | Chthoniobacter flavus Ellin428                    | CfE428DRAFT_5455            | -                                                |

Organisms with reconstructed Rex regulons (available for view in RegPrecise database) are in bold

Experimentally studies Rex regulators are in red

Rex duplicates are in purple
